# Supplementary material for: Targeting MMP9 in CTNNB1 mutant hepatocellular carcinoma restores CD8+ T cell-mediated antitumour immunity and improves anti-PD-1 efficacy
Source: PubMed Central journal article supplement — Gut. 2023 Dec 13;73(6):985–99. doi: 10.1136/gutjnl-2023-331342 (PMC11103337; doi:10.1136/gutjnl-2023-331342), 2023-12-13
Supplement: gutjnl-2023-331342supp001.pdf [file gutjnl-2023-331342supp001.pdf]

## Materials and methods

### Patient and Specimens

We used 314 pairs of HCC tissues (pairs refer to tumor tissue and adjacent tissue from the same patients) from patients who underwent liver biopsy at the Hepatic Surgery Center of Tongji Hospital of University of Science and Technology (HUST, Wuhan, China) between February 2015 and March 2018. All samples were pathologically diagnosed with HCC and followed up for prognostic assessment. All samples were used for Sequencing of the CTNNB1 exons 3. 196 pairs of HCC tissues from this cohort were utilized to construct microarrays for immunohistochemistry (IHC) experiments. 99 pairs of HCC tissues from this cohort were used for the Quantitative real time polymerase chain reaction (q-PCR). All patients provided signed informed consent forms. The study was approved by the Ethics Committee of Tongji Hospital (HUST, Wuhan, China), and sample tissues were utilized in accordance with the appropriate regulations.

### Cell Lines and Cell Culture

HEK 293T cell line and Hepa1-6 cell line were purchased from China Center for Type Culture Collection (CCTCC, Wuhan, China). HEK 293T and Hepa1-6 cells were cultured in Dulbecco's modified Eagle's medium (DMEM, HyClone, #SH30022.01) containing 10% FBS (Gibco, #10099) at 37°C and 5% CO<sub>2</sub> in an incubator. Both of the cell lines were routinely authenticated and were free of *Mycoplasma* contamination. CD8<sup>+</sup> T cells were cultured in RPMI 1640 medium (HyClone; #SH30809.01) supplemented with 10% FBS (Gibco, #10099), 1% penicillin/streptomycin (Kerui; #KR151400), 5 µg/mL CD3ε (Biolend; #100340), 1 µg/mL CD28 (Biolend; #302934) and 20 ng/mL mIL2 (R&D Systems; #402-ML) at 37°C and 5% CO<sub>2</sub>.

### Animal Studies

All animal care and experimental protocols were performed according to the National Institutes of Health Guidelines for the Care and Use of Laboratory Animals and approved by the Ethics Committee of Tongji Hospital (HUST, Wuhan, China). MMP9<sup>F/F</sup> and MMP9<sup>Ahep</sup> mice were purchased from Cyagen Biosciences Inc. For HCC induced by hydrodynamic tail vein injection (HTVi), 6-week-old male C57BL/6J mice (Gempharmatech Co., Ltd) (n = 6) were used. For each mouse, *pT3-ΔN90-CTNNB1* (10 µg)/*pT3-vector* (10 µg)/*pT3-EF1aH-myr-AKT* (20 µg)/*pT3-EF1aH-c-Met* (20 µg)/*pT3-EF1a-MYC-IRES-Luciferase* (15 µg)/*SB100* transposase-encoding plasmid (1/4 of the total plasmid mass) were dissolved in 2 mL 0.9% NaCl solution and injected 10% of the weight of each mouse in volume in 5-8 seconds. Equivalent DNA concentration between different batches of DNA was confirmed to ensure reproducibility among experiments. Mice were monitored and euthanized when they developed large abdominal masses and become moribund. At the end of the experiment, solid tumors were collected and analyzed by IHC, flow cytometry and/or mIF.

In the subcutaneous tumor formation assay, 2 × 10<sup>6</sup> logarithmic growth-phase Hepa1-6 cells in 100 µL of DMEM (HyClone, #SH30022.01) were injected into the axillary regions of 4-week-old BALB/C male nude mice (n = 7) and 6-week-old male C57BL/6J mice (Gempharmatech Co., Ltd) (n = 6). For orthotopic HCC models, 6-week-old male C57BL/6J mice (Gempharmatech Co., Ltd) (n = 6-15) were injected in the largest liver lobe with 8 × 10<sup>6</sup> Hepa1-6 cells in 30 µL of DMEM (HyClone, #SH30022.01). After 3 weeks, all the mice were sacrificed. Livers were harvested to assess the tumor burden. At the end of the experiment, solid tumors were collected and analyzed by IHC, flow cytometry and/or mIF.

For the T cell depletion experiments, mice were injected intraperitoneally with anti-CD8 (200µg, clone 53-6.7, BioXcell), anti-CD4 (200µg, clone GK1.5, Sellect), IgG2a (200µg, clone 2A3, BioXcell) or IgG2b (200µg, clone LTF-2, Sellect) twice a week. For the Macrophage depletion experiments, mice were injected intraperitoneally with Clophosome (1.4mg first day, 0.7mg every 6 days, FormuMax, #F70101C-N). For the experiments with anti-PD-1 mAbs, mice were intravenously injected with anti-PD-1 (200µg, Junmeng Jiangsu, #GC42) every three days via the tail vein. For blocking the function of MMP9, mice were injected intraperitoneally with MMP9-in-1 (20mg/kg, MedChemExpress) every two days.

All experiments were randomized according to numbers. The personnel who treated the mice were aware of the group allocation at the different stages of the experiment.

### **Flow Cytometry Sample Preparation and Cytokine/Surface Staining**

Fresh harvest tumors were cut into small pieces (~1 mm<sup>3</sup>) with scissors and digested with collagenase IV (1mg/mL in 10% FBS DMEM, Biosharp, #BS165) and DNaseI (0.1mg/mL in 10% FBS DMEM, Biosharp, #BS137) for 30 minutes at 37°C. Dissociated tumor samples were homogenized and filtered through a 200-mesh screen and then filtered through a 70-µm strainer. ACK Lysis Buffer (Servicebio, #G2015) was utilized to lyse erythrocytes. Single cells were resuspended in 100µL pre-cooled living cells staining mix (0.5µL/sample FVS in PBS) and incubated for 10 minutes on ice. Then cells were blocked and stained for 30 minutes with surface antibody mix (1µL/sample in PBS). For intracellular cytokine staining, cells were stimulated for 3-6 hours and treated with Phosflow Perm Buffer III (BD Pharmingen, #558050) according to the manufacturer's instructions. Finally, cells were washed, resuspended, and stored at 4°C before acquisition on a flow cytometry instrument (CytoFLEX). Flow cytometry data were analyzed using FlowJo (BD Pharmingen, v10.3.5) software. Antibody and suppliers are listed in Supplementary Table S5.

### **T-Distributed Stochastic Neighbor Embedding (tSNE) analysis in FlowJo**

Raw data were cleaned up to exclude doublets, debris and dead cells. In addition, cells of interest were incorporated for further analysis. Appropriate fluorescence compensated parameters were selected in each fluorescence channel. Then, the plugin "downsample" was used to down sample the events to ensure an equal number of cells per sample. All samples were concatenated together and run tSNE on this single large file for comparing multiple samples. After running tSNE, FlowJo will automatically add to separate the files using the variable "Sample ID".

### **Immunoblot and Coimmunoprecipitation**

Suspension cells harvested by centrifugation or cultured adherent cells proteins were dispersed in RIPA Lysis Buffer (Meilunbio, #MA0151) supplemented with 1/100 Protease Inhibitor Cocktail (MedChemExpress, #HY-K0010), 1/100 Phosphatase Inhibitor Cocktail I (MedChemExpress, #HY-K0021) and 1/100 Phosphatase Inhibitor Cocktail II (MedChemExpress, #HY-K0022) for 15 minutes on ice. For mouse tissue samples, the tissues were first homogenized using the tissue homogenizers (Servicebio, #KZ-III-F) in ice-cold above RIPA Lysis Buffer for 120 seconds (60Hz). Cell or tissue lysates were centrifuged at 12,000 rpm for 15 minutes at 4°C. Supernatants were collected and measured concentration by UV-Visible Spectrophotometer (BeckMan, #DU730). Then, the protein supernatants were adjusted to the same concentration by adding 5× SDS-PAGE

loading buffer (Servicebio, #G2075) and RIPA Lysis Buffer, and the samples were boiled at 95°C for 10 minutes. Prepared protein samples were loaded onto 10% SDS-PAGE gels, separated by electrophoresis, and then transferred onto polyvinylidene fluoride membranes (Millipore). After transfer, membranes were blocked with TBST containing 5% skim milk for 1 hour at room temperature. After washed with TBST 3 times at room temperature (each for 5 minutes), membranes were incubated with the indicated primary antibody at 4°C overnight. On the second day, membranes were washed with TBST 3 times (each for 10 minutes) and then incubated with secondary antibody (Horseradish Peroxidase-conjugated) for 1 hour at room temperature. Finally, membranes were washed with TBST 3 times (each for 10 minutes), and reactive bands were visualized and exposed using ECL substrate (Bio-Rad, #1705060/1705061). Antibodies and suppliers are listed in Supplementary Table S5.

For co-IP, transfected cells were lysed with IP cell lysates (Servicebio, #G2038) supplemented with 1/100 Protease Inhibitor Cocktail (MedChemExpress, #HY-K0010). Cell lysates were centrifuged at 12,000 rpm for 15 minutes at 4°C. Supernatants were incubated with co-IP-grade antibodies with rotation at 4°C overnight. On the second day, antibodies were pull down with Protein G Magnetic Beads (MedChemExpress, #HY-K0204) with rotation for 3-4 hours at room temperature. After washing with wash buffer 6 times, samples were added 2×SDS-PAGE loading buffer (Servicebio, #G2075) and boiled at 95°C for 10 minutes, followed by immunoblot analysis. Antibodies and suppliers are listed in Supplementary Table S5.

### RT-PCR

Total RNA was extracted from cultured cells and tissues using the RNA-easy Isolation Reagent (Vazyme, #R701-01) and used as a template to generate cDNA with the HiScript III RT SuperMix for qPCR (Vazyme, #R323-01). Q-PCR was performed using the ChamQ Universal SYBR qPCR Master mix (Vazyme, #Q711-02) on a Real-Time System (Bio-Rad, #CFX Connect) and analyzed using BioRadCFX Manager (Bio-Rad, v3.0) software. Relative RNA expression levels were determined by comparative threshold cycle ( $2^{-\Delta\Delta CT}$ ). Primers used are given in Supplementary Table S6.

### Dual-luciferase reported assay

Luciferase activity was detected with the Dual Luciferase Reporter Assay Kit (Vazyme, #DL101-01) according to the manufacturer's instructions. The relative luciferase activity was determined by a GloMax 20/20 Luminometer (Promega). Luciferase activity was normalized to Renilla activity.

### Immunohistochemistry and Analysis

Tissue specimens used for IHC were fixed in 4% paraformaldehyd and embedded in paraffin, and paraffin-embedded tissue sections that had been cut to 4 μm thickness. The paraffin sections were then deparaffinized, and antigen retrieval with 0.01 M sodium citrate buffer (pH6.0, Servicebio, #G1219) or Tris-EDTA buffer (pH8.0, Servicebio, #G1207), followed with 3% hydrogen peroxide incubated for 15 minutes at room temperature to block endogenous peroxidase. Next, the sections were blocked by 5% bovine serum albumin (BSA) blocking for 60 minutes at room temperature. Primary antibodies were incubated overnight at 4°C in a humidified chamber, followed by HRP conjugated secondary antibody incubation for 45 minutes at 37°C. The binding of antibodies was detected by DAB (Servicebio, #G1212) and the reaction was stopped by immersion in distilled water

after brown color was observed under the microscope. Tissue sections were counterstained by hematoxylin (Servicebio, #G1004), dehydrated in graded ethanol, sealed with neutral balsam, photos were taken and analyzed. Antibodies and suppliers are listed in Supplementary Table S5.

Positive and negative control groups were included for each batch of immunohistochemically stained sections. The IHC staining score was calculated according to the staining intensity and the percentage of positive cells. The rules of the staining intensity scoring were as follows: 0 points (Negative); 1 points (Light brown); 2 points (Brown); 3 points (Dark brown). The rules of stained positive cells scoring were as follows: score 0 denotes less than 10%, score 1 denotes 10-25%, score 2 denotes 26-50%, score 3 denotes 51-75% and score 4 denotes more than 75% of positive stained cells. The staining intensity and extent were multiplied to generate IHC staining score. Overall scores of  $<6$  and  $\geq 6$  were defined as low expression and high expression, respectively. IHC analyses were scored by two independent pathologists blind to the clinical data and grouping information.

### **Multiplex Immunofluorescence Staining**

For multiplex staining, we followed the tyramide signal amplification (TSA) protocol staining method. The methods of antigen retrieving, blocking endogenous peroxidase and BSA blocking were consistent with the IHC described above. The first primary antibody was incubated overnight at 4°C in a humidified chamber, followed by secondary antibody incubation for 45 minutes at 37°C. Tyramide working solution was incubated for 10 minutes at room temperature and protected from light. After washing with wash buffer for 20 minutes at 42°C and BSA blocking for 30 minutes at 37°C, the second primary antibody was incubated overnight at 4°C in a humidified chamber. The operations were then repeated as described above until meet the desired number of primary antibodies. The sections were sealed by anti-fluorescence quenching sealed tablets (Southern Biotech, #0100-01) after cell nuclei counterstained with DAPI (Solarbio, #C0060) for 5 min. Each of the stained sections was scanned using a slide scanner (3D HISTECH, # Panoramic SCAN II) under fluorescence conditions and analyzed using Zen Microscope (ZEISS, v2.6) software. Antibodies, suppliers and fluorescence channel are listed in Supplementary Table S5.

### **Plasmids and constructions**

MMP9 2.0 kb promoter sequence and SBE sites truncations were cloned into the pGL4.17 vector. Mammalian expression plasmids for Flag-, HA- or Myc-tagged SIRT2,  $\beta$ -catenin and KDM4D and the truncated proteins were constructed by standard molecular cloning method from cDNA templates. MMP9 promoter SBE site mutation plasmid was constructed by site-directed mutagenesis. All constructs were confirmed by DNA sequencing.

### **Lentivirus-transduced stable cell lines**

To generate stable gene over-expression or knockdown cells lines, Flag-tagged CDS of SIRT2 and SSH1 were cloned into the BamHI/SalI sites of pLenti-CMV-Puro plasmid (Addgene, #17448), or the short hairpin targeting sequences for MMP9, KDM4D and SSH1 were cloned into the pLKO.1-TRC vector (Addgene, #10879). Vectors contain Flag tag or scramble shRNA (Addgene #1864) were used as negative controls, respectively. HEK293 cells were co-transfected with pMD2.G (Addgene #12259), psPAX2 (Addgene #12260), and pLenti-CMV-Puro or pLKO.1-shRNA plasmids (ratio 1:3:4) to produce lentiviruses. Virus supernatant were collected at 48 hours post transfection, and were concentrated over 100-fold using a Lentivirus Concentration Solution

(Yeasen Biotechnology, #41101ES50), aliquots were stored at  $-80^{\circ}\text{C}$ . To establish stable murine HCC cell lines, forty-eight hours post lentivirus infection, cells were selected by puromycin addition ( $3\ \mu\text{g}/\text{mL}$ ). The target sequences for specific genes were as follows are listed in Supplementary Table S6.

### **T cell Cytotoxicity assays**

$\text{CD8}^{+}$  CTLs were sorted from 6-week-old male C57BL/6J mice splenocytes using a Mouse  $\text{CD8}^{+}$  T-Cell Isolation Kit (Selleck, #B90011) and incubated with  $5\ \mu\text{g}/\text{mL}$   $\text{CD3}\epsilon$  (Biolegend; #100340),  $1\ \mu\text{g}/\text{mL}$   $\text{CD28}$  (Biolegend; #302934) and  $20\ \text{ng}/\text{mL}$   $\text{mIL2}$  (R&D Systems; #402-ML) for 3 days. Prepared CTLs co-cultured with Hepa1-6 HCC cell line (Target ratio of 10:1) at  $37^{\circ}\text{C}$  for 12 hours. Next, all cells were collected for  $\text{CD45}$ , PI and Annexin V staining and immediate flow cytometry analysis. Percentage of  $\text{CD45}^{-}\text{annexin V}^{+}\text{PI}^{-}$  (early phase) and  $\text{CD45}^{-}\text{annexin V}^{+}\text{PI}^{+}$  (late phase) cells constituted the entire percentage of killed target cells.

### **Transwell chemotaxis assays**

$\text{CD8}^{+}$  T cells with the indicated treatments were allowed to migrate through  $5\text{-}\mu\text{m}$  transwell filters (Corning) to the medium in the bottom chamber for 12h, with PBS or tumor CM, were counted by flow cytometry. The following formula was used: chemotaxis index = percentage of migrated cells induced by the indicated chemokine  $\div$  percentage of migrated cells induced by PBS.

### **F-actin staining**

$\text{CD8}^{+}$  T cells treated with CXCL10 (ABclonal, #RP01642,  $100\text{ng}/\text{mL}$ ) for 15 minutes successively underwent a 15-minute fixation with fresh 4% paraformaldehyde, a 10-minute permeabilization with  $0.1\%$  Triton X-100, a 1-hour block with 5% normal goat serum, 15-minute staining with phalloidin FITC (YEASEN, #40735ES75) and DAPI counterstaining before confocal microscopy with a confocal laser-scanning microscope (Leica, #TCS SP8 STED). The Zen Microscope (ZEISS, v2.6) and ImageJ software were used to analyze and quantify F actin staining. All presented images are representative of three independent experiments with at least 30 cells per group. The line-fluorescence-intensity profile of cells was used to define cell polarization. The average fluorescence signal on one side of the polarized cells was more than 1.5 times stronger than that of the opposite side. The frequency of polarized or unpolarized distribution in  $\text{CD8}^{+}$  T cells was presented.

### **Library Preparation and RNA-seq Analysis**

Total RNA was extracted from tissues using the RNA-easy Isolation Reagent (Vazyme, #R701-01). A NanoDrop 2000 spectrophotometer (Thermo Scientific) was applied for RNA purity measurement and quantification, and an Agilent 2100 bioanalyzer (Agilent Technologies) was applied for RNA integrity assessment. Sequencing libraries were generated using the TruSeq Stranded mRNA LT Sample Prep Kit (Illumina) following the manufacturer's recommendations. Prepared libraries were sequenced on an Illumina HiSeq X Ten platform. The abundances of transcripts (including mRNAs, pseudogenes, noncoding RNAs, and other predicted RNAs) were calculated and normalized in fragments per kilobase of transcript per million mapped reads. Differential gene expression evaluation was analyzed using R software (v4.2.2).

## Single cell RNA-Sequencing and Data analysis

### Tissue dissociation and preparation

The fresh tissue was stored in the tissue preservation solution (Singleron Biotechnologies, sCellLive™) on ice after the surgery within 30 minutes. The specimens were washed with hanks balanced salt solution (HBSS) for three times, minced into small pieces, and then digested with 3 mL tissue dissociation solution (Singleron, sCellLive™) by tissue dissociation system (Singleron, PythoN™) at 37 °C for 15 min. The cell suspension was collected and filtered through a 40-micron sterile strainer. Afterwards, the red blood cell lysis buffer (RCLB, Singleron, GEXSCOPE®) was added, and the mixture (Cell: RCLB=1:2 (volume ratio)) was incubated at room temperature for 5-8 minutes to remove red blood cells. The mixture was then centrifuged at  $300 \times g$  4 °C for 5 minutes to remove supernatant and suspended softly with PBS. Finally, the samples were stained with Trypan Blue and the cell viability was evaluated microscopically.

### Library Construction and Single Cell RNA-seq Analysis

Single-cell suspensions ( $2 \times 10^5$  cells/mL) with PBS (HyClone) were loaded onto microwell chip using the single cell processing system (Singleron Matrix®). Barcoding Beads are subsequently collected from the microwell chip, followed by reverse transcription of the mRNA captured by the barcoding beads and to obtain cDNA, and PCR amplification. The amplified cDNA is then fragmented and ligated with sequencing adapters. The scRNA-seq libraries were constructed according to the protocol of the Single Cell RNA Library Kits (Singleron, GEXSCOPE®). Individual libraries were diluted to 4 nM, pooled, and sequenced on Illumina novaseq 6000 with 150 bp paired end reads.

## Tandem mass tag (TMT)-labeled proteomics

### PCT based protein digestion

Cell sample was transferred into a PCT tube. Then 30  $\mu$ L 6 M Urea/2 M thiourea/100 mM triethylammonium bicarbonate (TEAB), 5  $\mu$ L 200 mM Tris (2-carboxyethyl) phosphine (TCEP) and 2.5  $\mu$ L 800 mM iodoacetamide (IAA) was added for reduction and alkylation under 45000 psi, with 30 s high pressure and 10 s ambient pressure per cycle, 30 °C for 90 cycles. 75  $\mu$ L 100Mm TEAB was added into PCT tube to decrease the concentration of Urea to lower than 1.5 M. Then 10  $\mu$ L Trypsin (0.5  $\mu$ g/ $\mu$ L), 2.5  $\mu$ L Lys-C (0.5  $\mu$ g/ $\mu$ L) were added for protein digestion under 20000 psi, with 50 s high pressure and 10 s ambient pressure per cycle, 30 °C for 120 cycles. Tryptic peptides were transferred into 1.5 mL tubes and digestion was then terminated by 15  $\mu$ L 10% TFA.

### Desalting and TMT labeling

Confirm that pH of the samples was between 2 and 3. SOLA $\mu$  (Thermo Fisher Scientific™, San Jose, USA) was applied for desalting and TMTpro 16plex Isobaric Label Reagent Set was applied for TMT labeling according to their user guide.

### High pH Fractionation

Fractionation was performed with a Waters XBridge Peptide BEH C18 column (300 Å, 5  $\mu$ m  $\times$  4.6 mm  $\times$  250 mm) under a DIONEX UltiMate 3000 Liquid Chromatogram. Mobile phase A was 10 mM ammonium hydroxide (pH=10), and mobile phase B was 98% ACN, 10 mM ammonium hydroxide (pH=10). Peptides were collected every one minute from 5% ACN to 35% ACN with a flowrate of 0.5 ml/min in 60 min, and then combined into 30 fractions. After SpeedVac dried, the 30 fraction samples were resuspended with 2% ACN, 0.1% Formic Acid and then sent for LC-MS analysis.

**MS analysis**

LC-MS/MS with the nanoflow DIONEX UltiMate 3000 RSLCnano System coupled to an Orbitrap Exploris 480 mass spectrometer (Thermo Scientific™, San Jose, USA), which equipped with a FAIMS Pro™ (Thermo Scientific™, San Jose, USA), in data dependent acquisition (DDA) mode. Buffer A. 2% ACN, 98% H<sub>2</sub>O containing 0.1% FA; Buffer B. 98% ACN in water containing 0.1% FA. All reagents were MS grade for each acquisition, peptides were loaded onto a precolumn (3 μm, 100 Å, 20 mm\*75 μm i.d.) at a flowrate of 6 μL/min for 4 min and then injected using a 30 min LC gradient (from 7% to 30% buffer B) at a flowrate of 300 nL/min (analytical column, 1.9 μm, 120 Å, 150 mm\*75 μm i.d.). Buffer A was 2% ACN, 98% H<sub>2</sub>O containing 0.1% FA, and buffer B was 98% ACN in water containing 0.1% FA. All reagents were MS grade. The m/z range of MS1 was 375-1800 with the resolution at 60,000, normalized AGC target of 300% with the intensity threshold of 2e4, and maximum ion injection time (max IT) of 50 ms. MS/MS experiment were performed with a resolution at 30000, normalized AGC target of 200%, and max IT of 86 ms. isolation window was set to 0.7 m/z and first mass was set to 110 m/z.

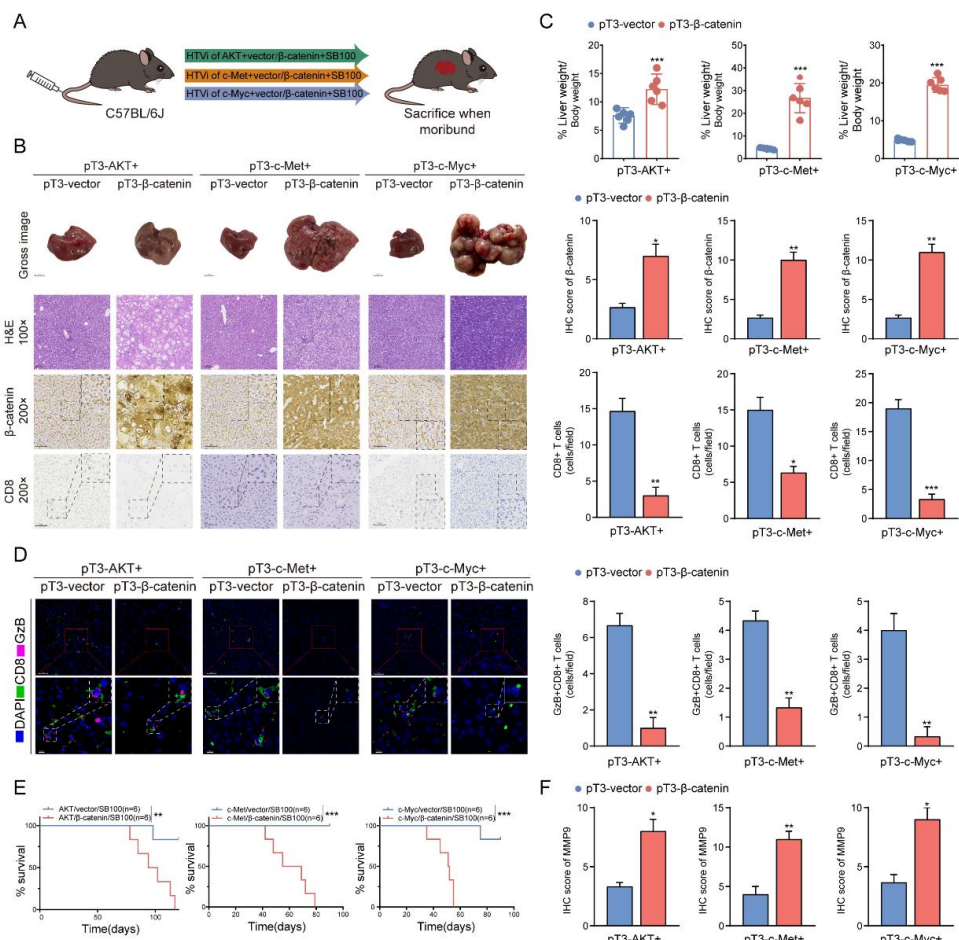

### Supplementary Figure S1 Three groups of CTNNB1<sup>GOF</sup> HCC models were constructed in mice

(A) Three groups of CTNNB1<sup>GOF</sup> HCC models were constructed via HTVi of activated AKT (myr-AKT)/ $\beta$ -catenin ( $\Delta$ N90- $\beta$ -catenin), c-Met/ $\beta$ -catenin and c-Myc (MYC-IRES-Luc)/ $\beta$ -catenin plasmids. (B) Gross images, H&E staining, and IHC staining of  $\beta$ -catenin and CD8 in the three groups of CTNNB1<sup>GOF</sup> HCC models and statistical analyses. The number of CD8-positive cells per HPF was counted in HCC sections from each group. Three random HPFs were selected for analysis on each slide. (C) The liver to body weight ratio of the three groups of CTNNB1<sup>GOF</sup> HCC models (n=6). (D) Representative images of immunofluorescence costaining for CD8 (green) with granzyme B (pink) in the three groups of CTNNB1<sup>GOF</sup> HCC models and statistical analyses. The number of cells positive for both CD8 and granzyme B per HPF was counted in HCC sections from each group. Three random HPFs were selected for analysis on each slide. (E) Survival curves of mice in each group (n=6). (F) The IHC staining score analyses of MMP9 in each group. Three random HPFs were selected for analysis on each slide. \* $P$ <0.05, \*\* $P$ <0.01, \*\*\* $P$ <0.001. Mean $\pm$ SEM. Unpaired Student's t-test (B,C,D,F), log-rank test (E). CTNNB1<sup>GOF</sup>, gain of function mutations in CTNNB1; IHC, immunohistochemistry; HPF, high-power field.



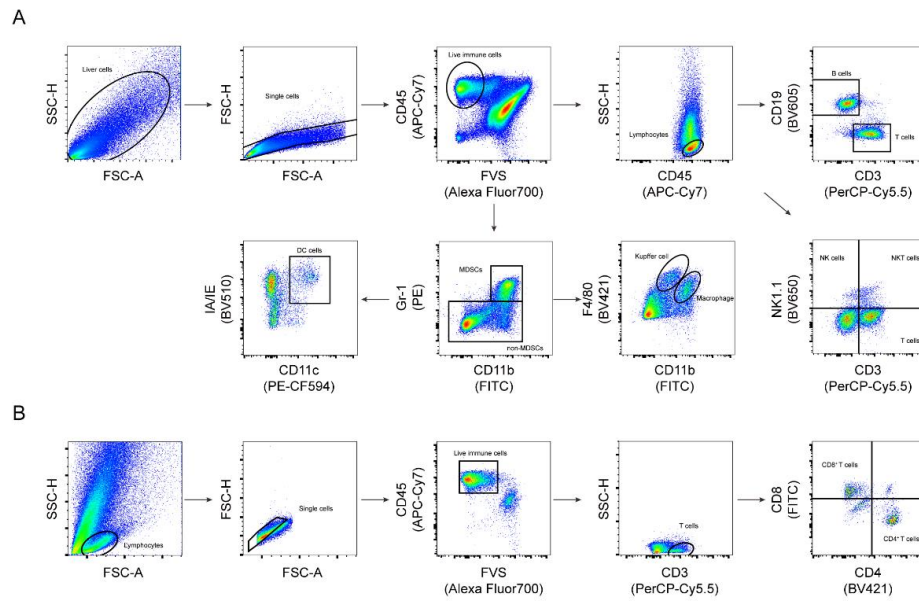

**Supplementary Figure S2 Flow cytometry analysis of liver immune microenvironment in the three groups of CTNBN1<sup>GOF</sup> HCC models**

**(A, B)** The gate method of live hepatic CD45<sup>+</sup> cells.

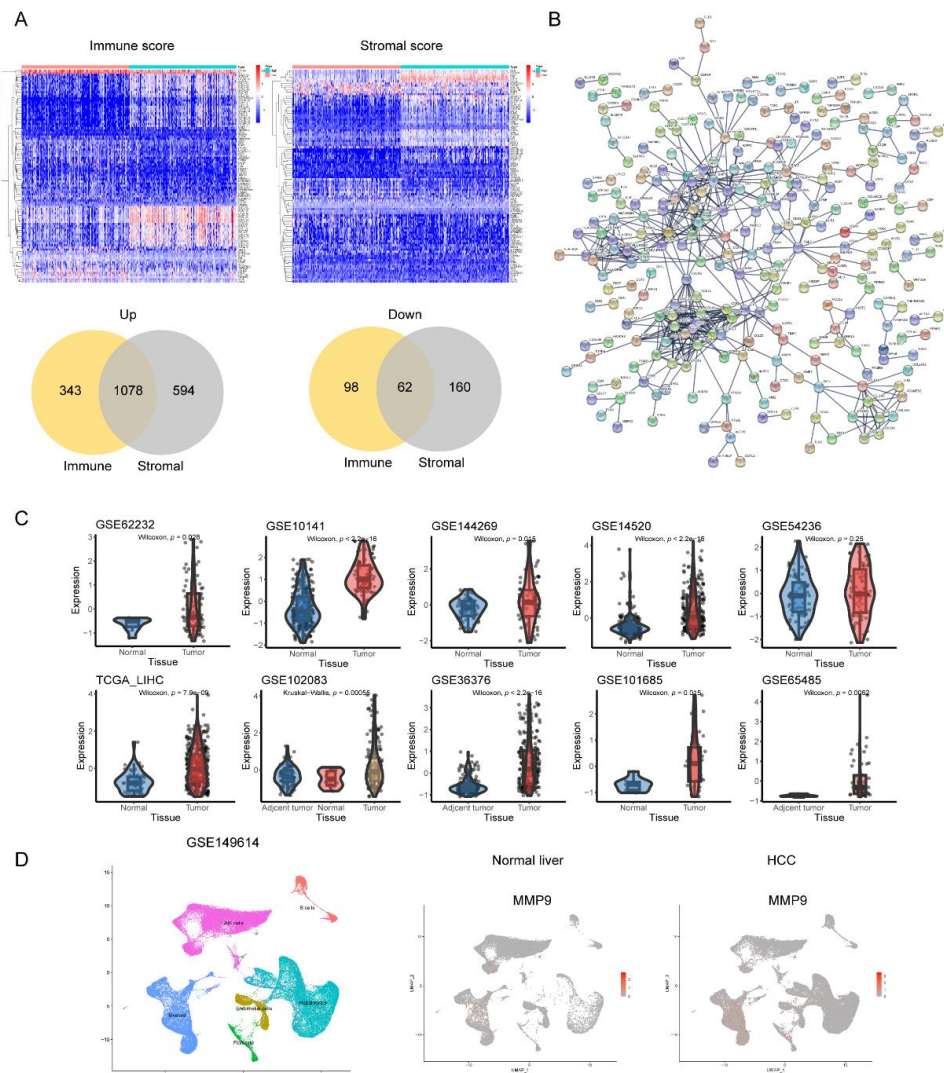

### Supplementary Figure S3 Bioinformatics analyses of public database data

(A) The heatmap and Venn diagram of DEGs screened by ImmuneScore and StromalScore analysis in TCGA dataset. (B) The PPI network diagram of genes associated with immune regulation. (C) The mRNA expression of MMP9 in normal liver and HCC tissue in GEO datasets. (D) Analysis of MMP9 gene expression in various cells using *Lu's* single cell expression data. TCGA, The Cancer Genome Atlas; DEGs, differentially expressed genes; GEO, Gene Expression Omnibus; PPI, Protein-protein interaction.

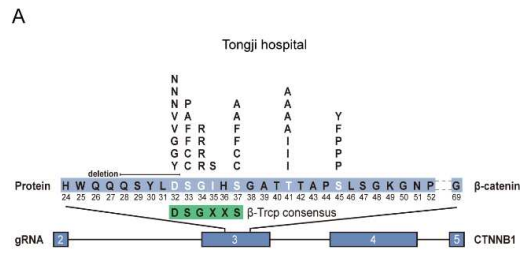

### Supplementary Figure S4 Spectrum of CTNNB1 exon3 mutations in HCC

(A) Mutations in CTNNB1 exon3 identified in HCC Tongji cohort. Amino acid substitutions and small in-frame deletions identified in the tumors are shown above the human  $\beta$ -catenin amino acid sequence.

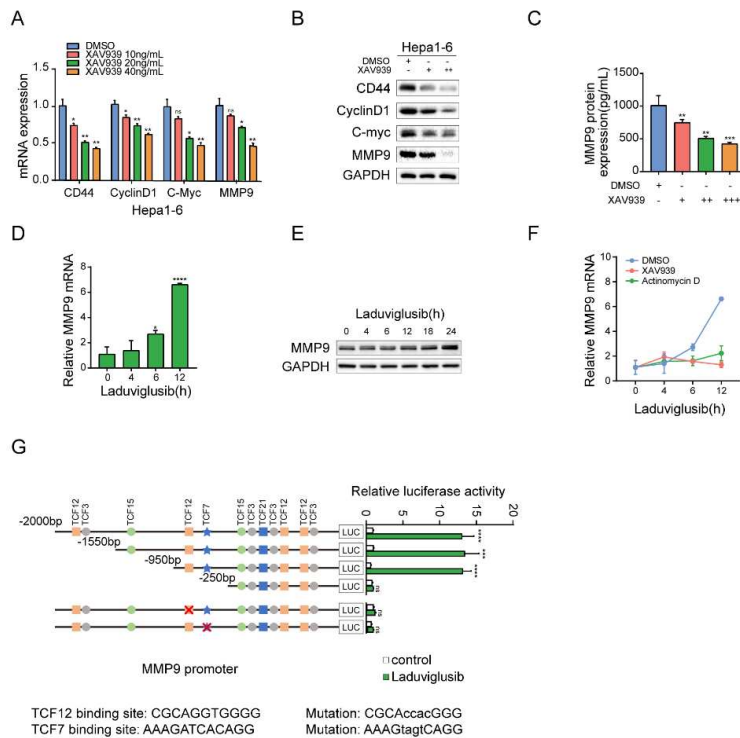

### Supplementary Figure S5 Wnt/ $\beta$ -catenin signal regulates MMP9 transcription in HCC *in vitro*

(A) Hepa1-6 cells were treated with Wnt/ $\beta$ -catenin signature inhibitor XAV939 (10/20/40 ng/mL) or DMSO. The mRNA expression of CD44, CyclinD1, c-myc and MMP9 were measured by qRT-PCR. (B) Hepa1-6 cells were treated with XAV939(10/20 ng/mL) or DMSO followed by western blotting to detect the expression of CD44, CyclinD1, c-myc and MMP9. (C) Hepa1-6 cells were treated with XAV939(10/20/40 ng/mL) or DMSO followed by Elisa to detect the MMP9 secretion level from culture medium supernatant. (D) Hepa1-6 cells were treated with Wnt/ $\beta$ -catenin activator laduviglusib (10 ng/mL). The mRNA expression of MMP9 were measured by qRT-PCR. (E) Hepa1-6 cells were treated with laduviglusib (10 ng/mL) followed by western blotting to detect the expression of MMP9. (F) Time course of MMP9 mRNA levels in Hepa1-6 cells treated with laduviglusib (10 ng/mL), together with XAV939 (20 ng/mL) or actinomycin D (1 mg/mL). (G) Activities of MMP9 promoter truncations or mutations in laduviglusib- $\beta$ -treated Hepa1-6 cells were measured by dual-luciferase assays. \* $P$ <0.05, \*\* $P$ <0.01, \*\*\* $P$ <0.001, \*\*\*\* $P$ <0.0001. Mean $\pm$ SEM. Unpaired Student's  $t$ -test(A,C,D,F,G). qRT-PCR, quantitative real-time PCR.

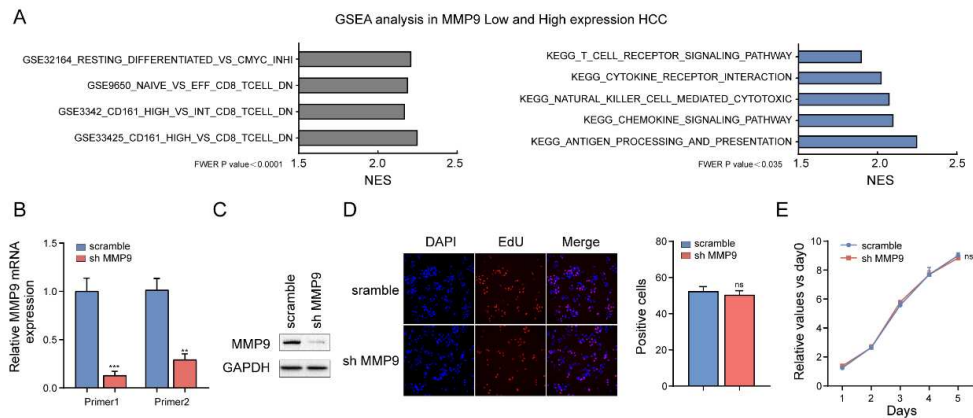

### Supplementary Figure S6 MMP9 had little impact on HCC proliferation *in vitro*

(A) GSEA analysis in MMP9 low and high expression HCC obtained from the TCGA dataset. (B, C) qRT-PCR and western blotting analyses of MMP9 knockdown efficiency in Hepa1-6 cell line. (D, E) EdU and CCK-8 experiments were used to verify the effect of MMP9 on proliferation capability. ns, no significance,  $**P < 0.01$ ,  $***P < 0.001$ . Mean  $\pm$  SEM. Unpaired Student's t-test (B, E). GSEA, Gene Set Enrichment Analysis; qRT-PCR, quantitative real-time PCR; CCK8, Cell Counting Kit-8.

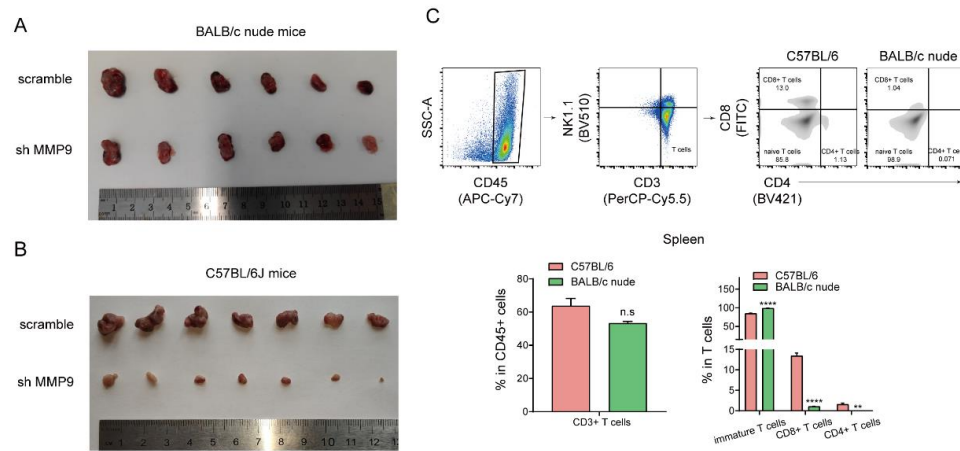

### Supplementary Figure S7 Knockdown of MMP9 significantly suppressed HCC progression in C57BL/6J mice but not in BALB/c nude mice

(A, B) Gross images of Hepa1-6 (scramble/sh MMP9) subcutaneous tumors in BALB/c nude mice and C57BL/6J mice. (C) Representative flow cytometry data showing the proportion of T cells in spleens from C57BL/6J mice and BALB/c nude mice. The statistics results are shown below (n=5). ns, no significance, \* $P < 0.05$ , \*\* $P < 0.01$ , \*\*\*\* $P < 0.0001$ . Mean  $\pm$  SEM. Unpaired Student's t-test (C).

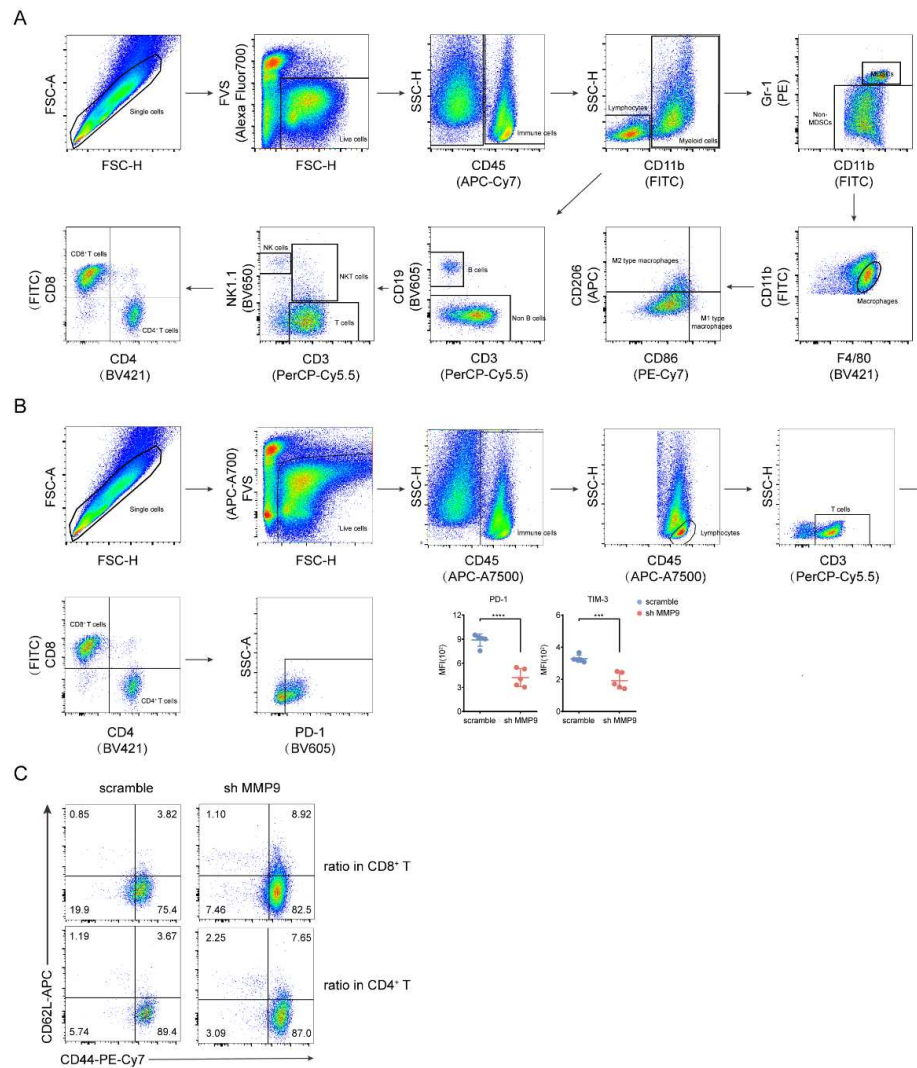

**Supplementary Figure S8 Flow cytometry analysis of liver immune microenvironment in orthotopic tumor tissue from C57BL/6 mouse models**

(A) The gate method of live hepatic CD45<sup>+</sup> cells. (B, C) The gate method of ICB (PD-1, TIM-3, CTLA-4 and LAG-3) positive T cells and immune memory (CD44<sup>lo</sup> CD62L<sup>hi</sup>, CD44<sup>hi</sup> CD62L<sup>lo</sup> and CD44<sup>hi</sup> CD62L<sup>hi</sup>) T cells. ICB, immune checkpoint blockade; PD-1, programmed death-1; TIM-3, t cell immunoglobulin and mucin domain-3.

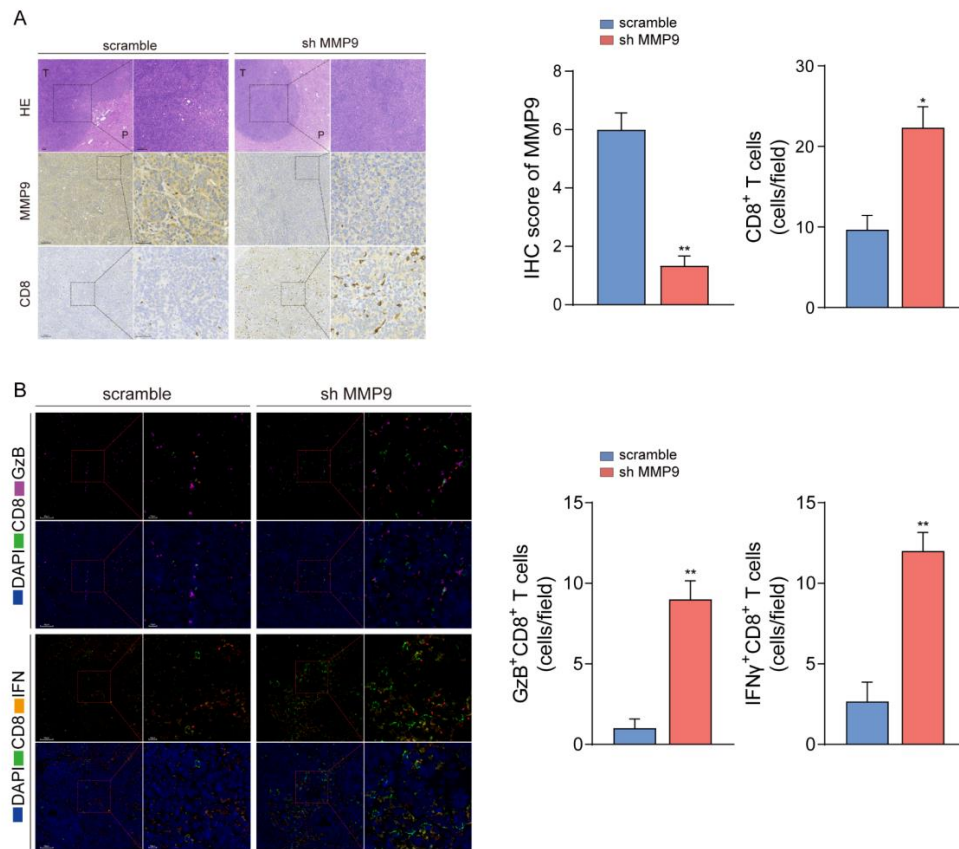

### Supplementary Figure S9 Knockdown of MMP9 enhances cytotoxicity of CTLs

(A) H&E staining and IHC staining of MMP9 and CD8 in orthotopic tumor tissue from C57BL/6 mouse models and statistical analyses. The number of CD8-positive cells per HPF was counted in HCC sections from each group. Three random HPFs were selected for analysis on each slide. (B) Representative images of immunofluorescence costaining for CD8 (green) with granzyme B (violet) or IFN- $\gamma$  (orange) in orthotopic tumor tissue from C57BL/6 mouse models and statistical analyses. The number of cells positive for both CD8 and granzyme B or IFN- $\gamma$  per HPF was counted in HCC sections from each group. Three random HPFs were selected for analysis on each slide. \* $P$ <0.05, \*\* $P$ <0.01. Mean $\pm$ SEM. Unpaired Student's t-test(A,B). IFN- $\gamma$ , interferon  $\gamma$ .



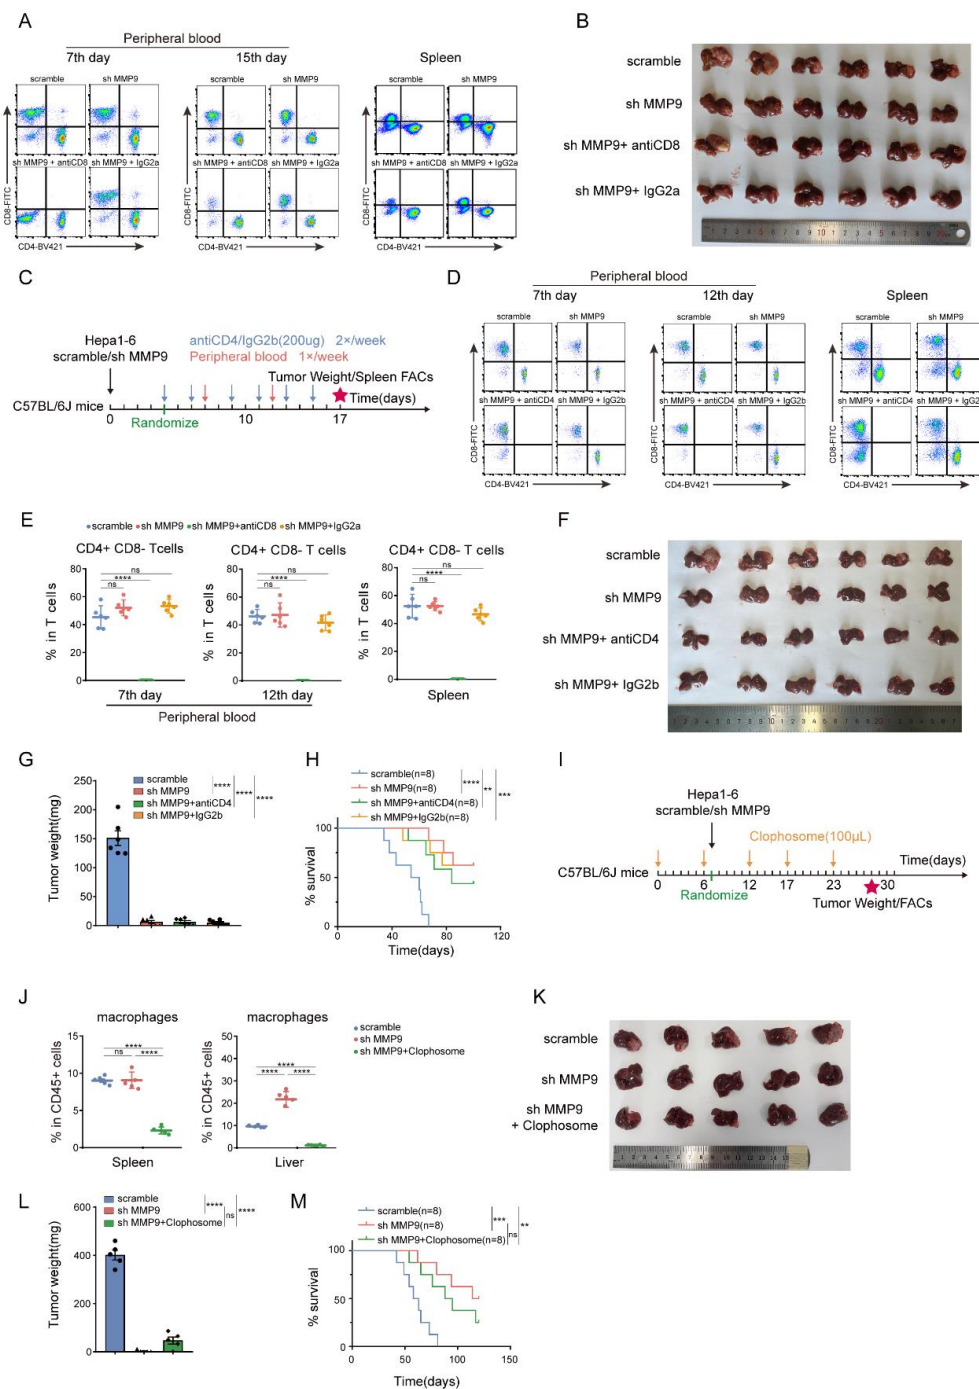

### Supplementary Figure S10 MMP9 promotes HCC progression through CD8<sup>+</sup> T cell-dependent rather than CD4<sup>+</sup> T cell or macrophage-dependent mechanisms

(A) Representative flow cytometry data showing the proportion of CD8<sup>+</sup> T cells from peripheral blood and spleen tissue. (B) Gross images of Hepa1-6 tumors in C57BL/6J mice (CD8-neutralizing antibodies, 200 µg/mice; IgG2a, 200 µg/mice). (C) Schematic representation of the treatment schedule for CD4-neutralizing antibodies or IgG2b. (D) Representative flow cytometry data

showing the proportion of CD4<sup>+</sup> T cells from peripheral blood and spleen tissue. **(E)** Flow cytometry analysis of depletion efficiency of CD4<sup>+</sup> T cells from peripheral blood and spleen tissue. **(F)** Gross images of Hepa1-6 tumors in C57BL/6J mice (CD4-neutralizing antibodies, 200 µg/mice; IgG2b, 200 µg/mice). **(G)** The tumor weight of C57BL/6J mouse models (CD4-neutralizing antibodies, 200 µg/mice; IgG2b, 200 µg/mice, n=6). **(H)** Survival curves of mice in each group of C57BL/6J mouse models (n=8). **(I)** Schematic representation of the treatment schedule for clophosome (macrophage scavenger). **(J)** Flow cytometry analysis of depletion efficiency of macrophages from spleen and liver tissue. **(K)** Gross images of Hepa1-6 tumors in C57BL/6J mice (1.4mg first day, 0.7mg every 6 days). **(L)** The tumor weight of C57BL/6J mouse models (clophosome, 100 µL/mice, n=5). **(M)** Survival curves of mice in each group of C57BL/6J mouse models (n=8). ns, no significance, \*\* $P < 0.01$ , \*\*\* $P < 0.001$ , \*\*\*\* $P < 0.0001$ . Mean ± SEM. One-way ANOVA with Tukey's multiple comparisons test(E, G, J, L), log-rank test(H, M). FACs, Fluorescence-activated cell staining.

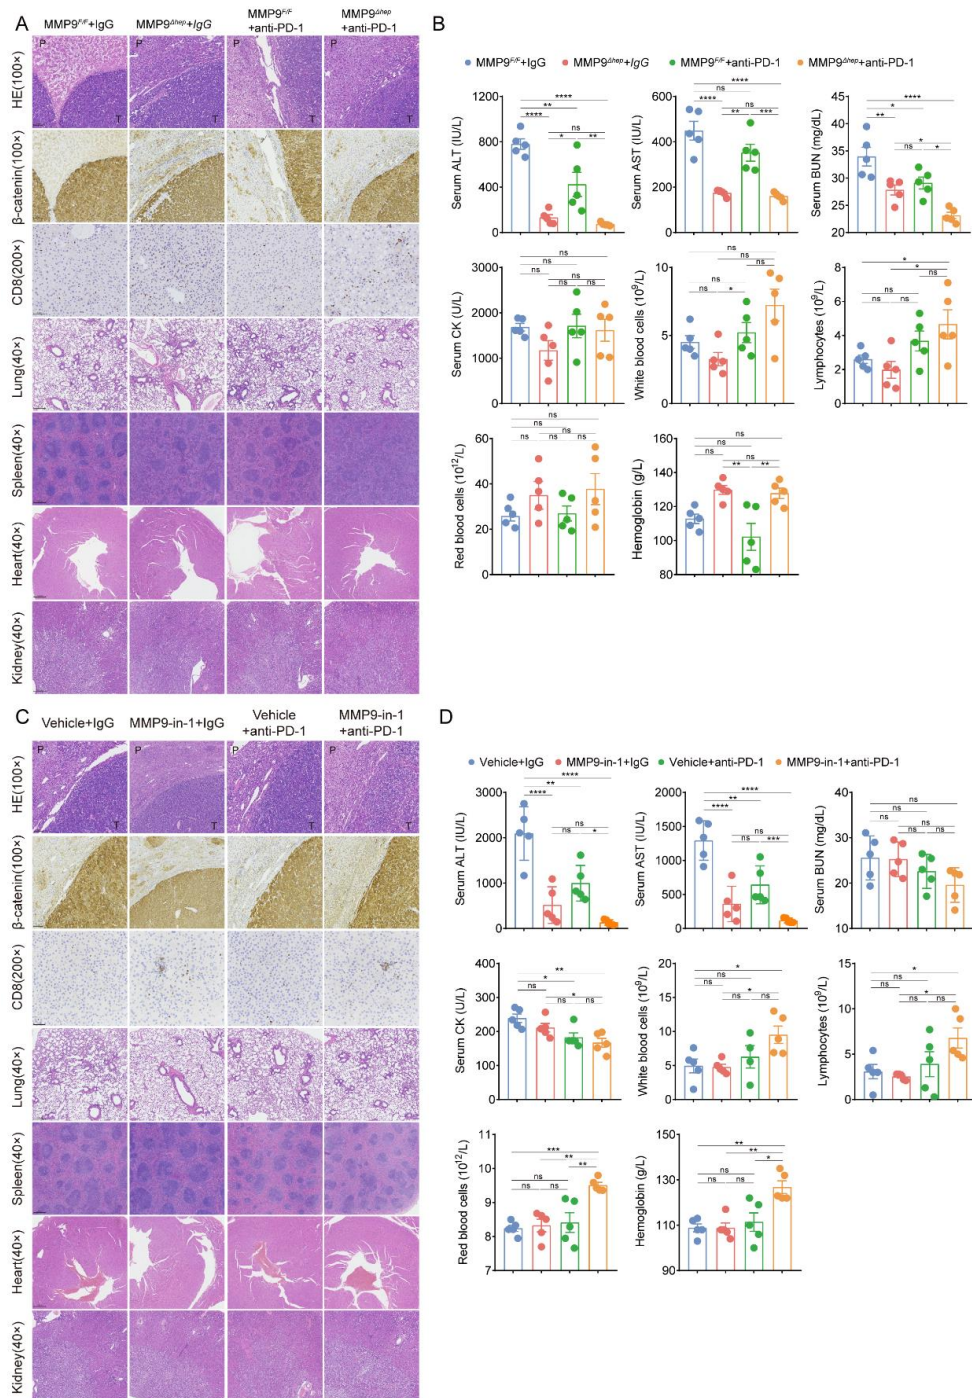

### Supplementary Figure S11 The safety of combination therapy was validated through H&E staining, IHC, blood routine and blood biochemistry test analyses

(A) H&E staining and IHC staining of  $\beta$ -catenin and CD8 in the four groups of spontaneous HCC models driven by c-Myc/ $\beta$ -catenin (MMP9<sup>F/F</sup> + IgG; MMP9<sup>Ahep</sup> + IgG; MMP9<sup>F/F</sup> + anti-PD-1; MMP9<sup>Ahep</sup> + anti-PD-1, anti-PD-1, 200  $\mu$ g/mice; IgG, 200  $\mu$ g/mice). (B) Blood routine and blood biochemistry test analyses of four groups of spontaneous HCC models driven by c-Myc/ $\beta$ -catenin

(MMP9<sup>F/F</sup> + IgG; MMP9<sup>Ahep</sup> + IgG; MMP9<sup>F/F</sup> + anti-PD-1; MMP9<sup>Ahep</sup> + anti-PD-1, n=5). (C) H&E staining and IHC staining of  $\beta$ -catenin and CD8 in the four groups of spontaneous HCC models driven by c-Myc/ $\beta$ -catenin (Vehicle+ IgG; MMP9-in-1 + IgG; Vehicle + anti-PD-1; MMP9-in-1p + anti-PD-1, MMP9-in-1, 20mg/kg; anti-PD-1, 200  $\mu$ g/mice; IgG, 200  $\mu$ g/mice). (D) Blood routine and blood biochemistry test analyses of four groups of spontaneous HCC models driven by c-Myc/ $\beta$ -catenin (Vehicle+ IgG; MMP9-in-1 + IgG; Vehicle + anti-PD-1; MMP9-in-1p + anti-PD-1, n=5). ns, no significance, \* $P$ <0.05, \*\* $P$ <0.01, \*\*\* $P$ <0.001, \*\*\*\* $P$ <0.0001. Mean $\pm$ SEM. One-way ANOVA with Tukey's multiple comparisons test(B,D).

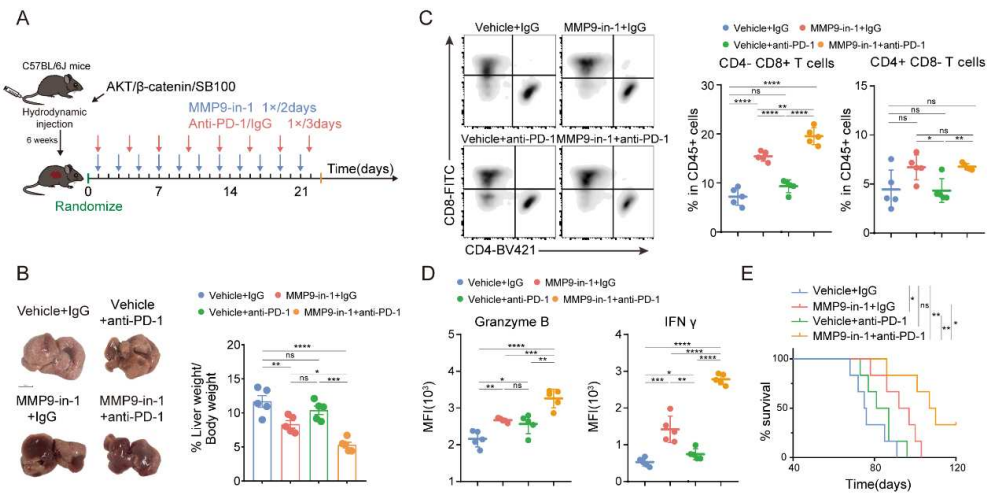

### Supplementary Figure S12 MMP-9-in-1 sensitizes the efficacy of the anti-PD-1 antibody in spontaneous HCC models driven by Akt/ $\beta$ -catenin

(A) Schematic representation of the therapy schedule for MMP9-in-1, anti-PD-1 or combination therapy. (B) Representative images and the statistical results from spontaneous HCC models driven by Akt/ $\beta$ -catenin that received the indicated treatments (MMP9-in-1, 20mg/kg; anti-PD-1, 200  $\mu$ g/mice; IgG, 200  $\mu$ g/mice, n=5). (C) Representative flow cytometry data showing the proportion of T cells in tumor tissue from spontaneous HCC models. The statistics results are shown on the right. (D) The statistics results of MFI of granzyme B and IFN- $\gamma$  on CD8<sup>+</sup> T cells in tumor tissue from spontaneous HCC models. (E) Survival curves of mice in each group of spontaneous HCC models (n=6). ns, no significance, \* $P$ <0.05, \*\* $P$ <0.01, \*\*\* $P$ <0.001, \*\*\*\* $P$ <0.0001. Mean $\pm$ SEM. One-way ANOVA with Tukey's multiple comparisons test(B, C, D), log-rank test(E).

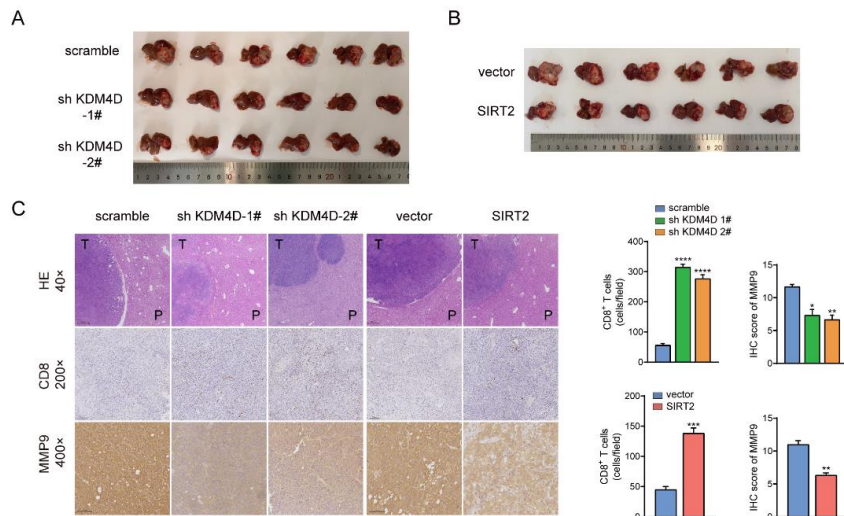

**Supplementary Figure S13 KDM4D knockdown and SIRT2 overexpression suppressed MMP9 expression and infiltration of CD8<sup>+</sup>T cells**

(A, B) Gross images of Hepa1-6 (scramble/sh KDM4D or vector/SIRT2) tumors in C57BL/6J mice.

(C) H&E staining and IHC staining of MMP9 and CD8 in orthotopic tumor tissue from C57BL/6J mouse models and statistical analyses. The number of CD8-positive cells per HPF was counted in HCC sections from each group. Three random HPFs were selected for analysis on each slide.

\* $P < 0.05$ , \*\* $P < 0.01$ , \*\*\* $P < 0.001$ . Mean  $\pm$  SEM. Unpaired Student's t-test(C).

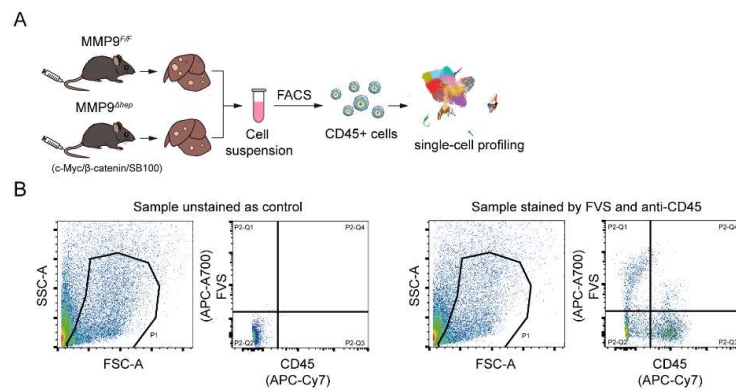

**Supplementary Figure S14 Sample preparation and sorting strategy for single-cell sequencing**

**(A)** Schematic representation of the experimental strategy. **(B)** Two-dimensional scatterplot, showing the gating strategy used to sort live CD45<sup>+</sup> immune cells (P2-Q3 in the right panel). Sorted cells were used as the template for single-cell RNA preparations.

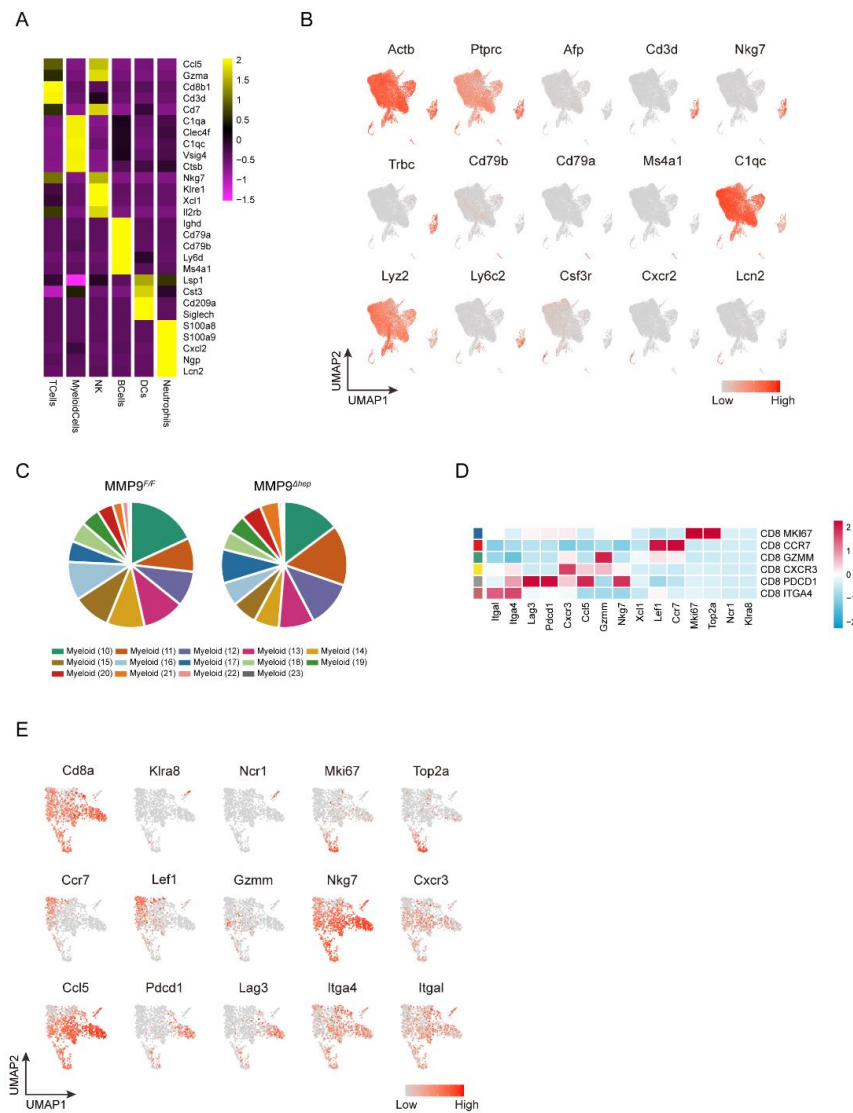

### Supplementary Figure S15 Single-cell sequencing profiling of the ecosystem in MMP9<sup>F/F</sup> and MMP9<sup>Δhep</sup> mice HCC samples

(A) Heatmap showing the expression of marker genes in the indicated cell types. (B) UMAP plot showing the expression levels of marker genes, defined for all cell types. (C) Tortadiagram indicating the proportion of myeloid immune cells. (D) Heatmap showing the expression of marker genes in the indicated CD8<sup>+</sup> cell types. (E) UMAP plot showing the expression levels of marker genes, defined for all CD8<sup>+</sup> cell types.



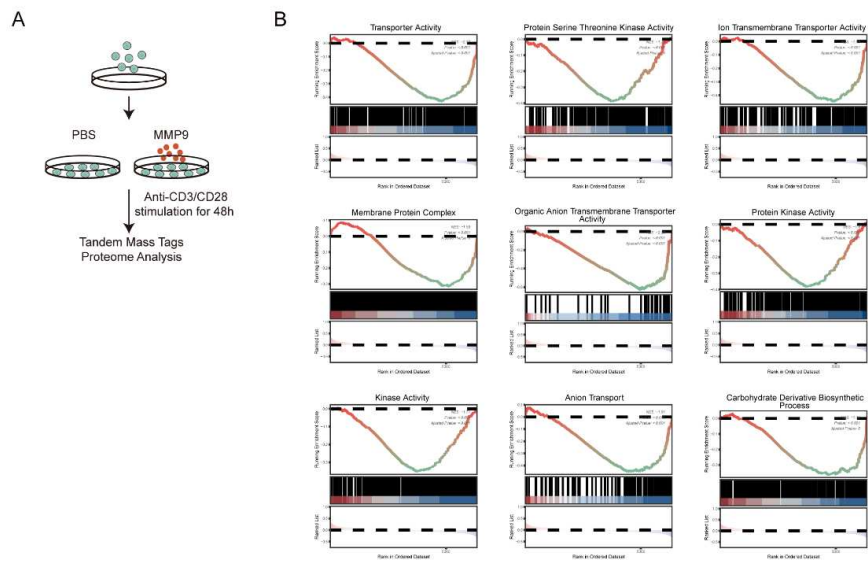

**Supplementary Figure S16 MMP9 stimulation was associated with a variety of membrane transport processes of CD8<sup>+</sup> T cells**

**(A)** Schematic representation of the experimental strategy. **(B)** GSEA of proteomics data revealed that MMP9 inhibits various of transporter activities on the cell membrane of CD8<sup>+</sup> T cells.

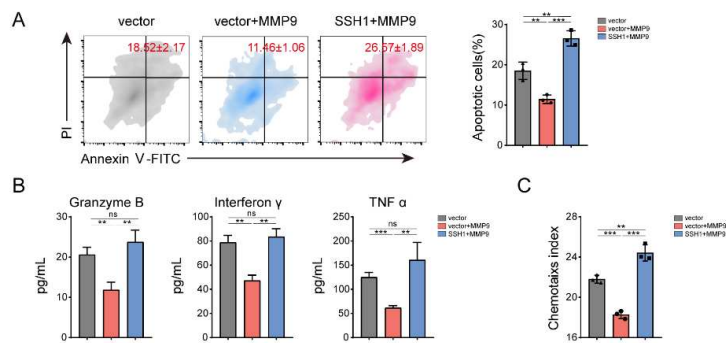

### Supplementary Figure S17 SSH1 upregulation abrogated the suppression of migration and activation of CD8<sup>+</sup> T cells induced by MMP9

**(A)** Apoptosis of Hepa1-6 cells caused by CD8<sup>+</sup> T cells (vector/vector+MMP9/SSH1+MMP9) was measured using Annexin V - PI staining. **(B)** CD8<sup>+</sup> T cells (vector/vector+MMP9/SSH1+MMP9) followed by Elisa to detect the granzyme B, IFN- $\gamma$  and TNF $\alpha$  secretion level from culture medium supernatant. **(C)** CD8<sup>+</sup> T cells (vector/vector+MMP9/SSH1+MMP9) were determined by the transwell assay, and the chemotaxis index is shown. ns, no significance, \*\* $P < 0.01$ , \*\*\* $P < 0.001$ . Mean  $\pm$  SD. One-way ANOVA with Tukey's multiple comparisons test(A,B,C).

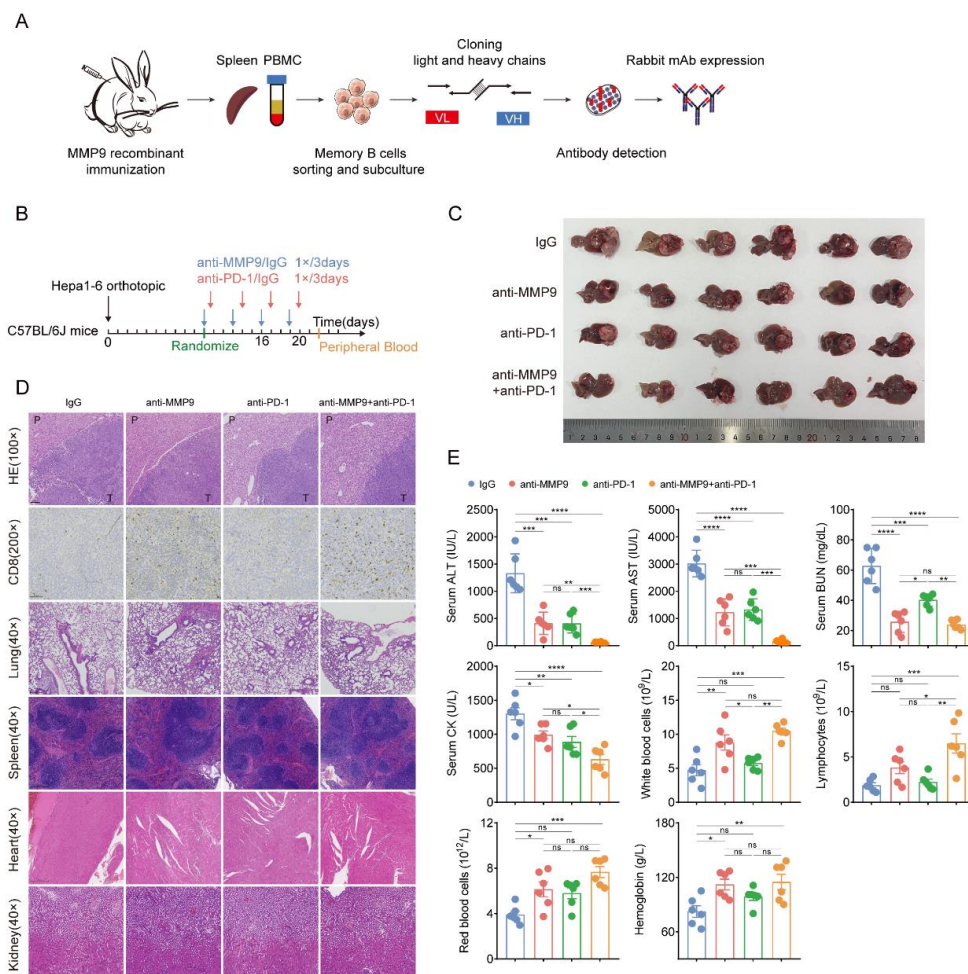

### Supplementary Figure S18 The anti-MMP9 antibody sensitizes the efficacy of the anti-PD-1 antibody

(A) Schematic representation of the anti-MMP9 rabbit monoclonal antibody development strategy. (B) Schematic representation of the therapy schedule for anti-MMP9, anti-PD-1 or combination therapy. (C) Representative images of Hepa1-6 orthotopic models that received the indicated treatments (anti-MMP9, 200 µg/mice; anti-PD-1, 200 µg/mice; IgG, 200 µg/mice, n=6). (D) H&E staining and IHC staining of CD8 in the four treatment groups of Hepa1-6 orthotopic models. (E) Blood routine and blood biochemistry test analyses in the four treatment groups of Hepa1-6 orthotopic models. \* $P < 0.05$ , \*\* $P < 0.01$ , \*\*\* $P < 0.001$ , \*\*\*\* $P < 0.0001$ . Mean ± SEM. One-way ANOVA with Tukey's multiple comparisons test (E).

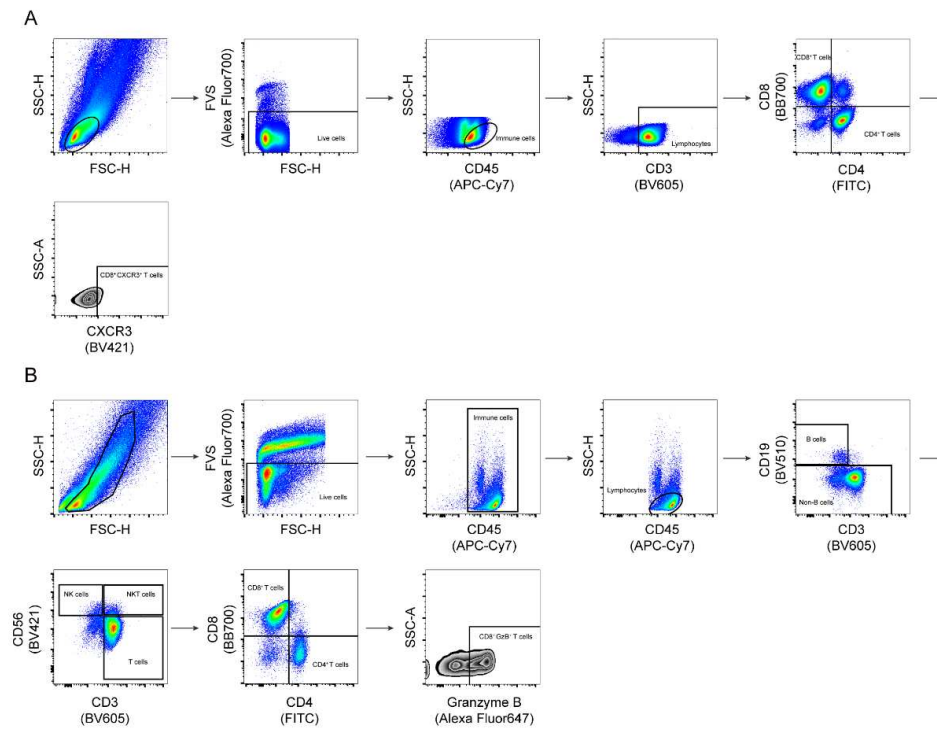

**Supplementary Figure S19 Flow cytometry analysis of primary HCC surgical samples**

(A) The gate method of CD8<sup>+</sup> CXCR3<sup>+</sup> T cells. (B) The gate method of CD8<sup>+</sup> Granzyme B<sup>+</sup> T cells.

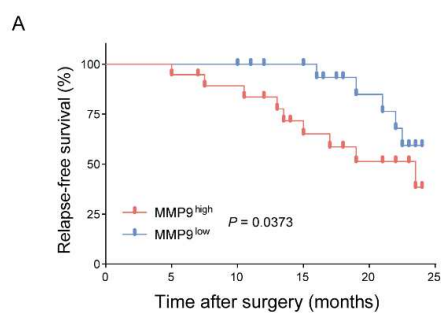

**Supplementary Figure S20 Relapse-free survival rate of patients after surgery.**

(A) Patients received anti-PD-1 adjuvant therapy after hepatectomy (n=38). Patients were re-examined every 3 months and evaluated within two years.

**Supplementary Table S1 Up-regulated genes in the three groups of spontaneous tumor compared with the corresponding control groups**

| gene   | AKT/ $\beta$ -catenin |          | C-Met/ $\beta$ -catenin |          | C-Myc/ $\beta$ -catenin |          |
|--------|-----------------------|----------|-------------------------|----------|-------------------------|----------|
|        | logFC                 | P value  | logFC                   | P value  | logFC                   | P value  |
| MMP9   | 1.569675              | 0.004823 | 2.936847                | 4.86E-06 | 4.238257                | 0.002186 |
| PROCR  | 1.323703              | 0.02475  | 1.651422                | 0.0359   | 1.521154                | 0.041868 |
| ZFP287 | 2.708681              | 0.009018 | 2.477729                | 0.020458 | 2.487976                | 0.019315 |

**Supplementary Table S2 DEGs screened by ImmuneScore and StromalScore**

| Gene           | logF<br>C        | Gene         | logF<br>C        | Gene             | logF<br>C        | Gene          | logF<br>C        | Gene               | logF<br>C        | Gene               | logF<br>C        |
|----------------|------------------|--------------|------------------|------------------|------------------|---------------|------------------|--------------------|------------------|--------------------|------------------|
| AL13<br>3371.2 | 1.44<br>190<br>1 | ZEB2         | 1.52<br>246<br>1 | LAP<br>TM5       | 1.56<br>525<br>4 | IGLC<br>7     | 3.71<br>795<br>2 | IGHV<br>1-69       | 3.32<br>853<br>1 | TME<br>M154        | 1.12<br>608<br>5 |
| NTRK<br>2      | 1.81<br>613<br>4 | ADA<br>M28   | 2.11<br>929      | IGK<br>V1-<br>17 | 2.47<br>282<br>1 | CCL2<br>2     | 2.04<br>756<br>8 | FPR1               | 2.23<br>156      | IGKV<br>2-24       | 2.59<br>857<br>2 |
| FCRL<br>A      | 1.56<br>318<br>8 | VCAN         | 1.45<br>213      | IGFB<br>P5       | 1.64<br>370<br>4 | CD20<br>OR1   | 1.50<br>280<br>7 | AC11<br>9044.<br>1 | 1.68<br>193      | GPR1<br>83         | 1.56<br>834      |
| PTPR<br>O      | 1.18<br>131<br>3 | TRGV<br>4    | 1.73<br>422<br>7 | PLE<br>K         | 1.65<br>229<br>4 | TRAV<br>8-2   | 1.96<br>924<br>7 | L1CA<br>M          | 1.52<br>323<br>4 | TRB<br>V4-1        | 2.48<br>585<br>7 |
| CRIP1          | 1.39<br>363<br>8 | TRAV<br>41   | 1.93<br>395<br>4 | GBP<br>5         | 2.95<br>448<br>2 | ITGA<br>X     | 1.33<br>736<br>3 | SLA<br>MF6         | 2.07<br>626<br>5 | RGS1               | 1.63<br>560<br>1 |
| CXCR<br>4      | 1.36<br>323<br>5 | AXL          | 1.48<br>801<br>1 | GPR<br>132       | 1.75<br>521      | MAP1<br>LC3C  | 2.27<br>088<br>1 | JAK3               | 1.68<br>554<br>5 | CCD<br>C80         | 2.78<br>944<br>7 |
| CXorf<br>21    | 1.54<br>172<br>1 | TNC          | 1.99<br>943<br>2 | COL<br>6A3       | 1.68<br>526<br>3 | ITGB<br>2-AS1 | 1.57<br>250<br>1 | MXR<br>A5          | 2.33<br>682      | STX1<br>1          | 1.34<br>931<br>7 |
| IGHA<br>2      | 2.73<br>232<br>9 | RPLP0<br>P2  | 1.22<br>730<br>9 | MMP<br>2         | 2.36<br>764<br>5 | IGKV<br>1D-13 | 3.29<br>664<br>9 | TME<br>M132<br>E   | 1.72<br>510<br>7 | PARV<br>G          | 1.61<br>097      |
| PODN<br>L1     | 1.79<br>780<br>7 | CXCR<br>2    | 1.68<br>471      | RUN<br>X2        | 1.74<br>353<br>3 | HSPB<br>7     | 1.70<br>565<br>4 | AC01<br>0457.<br>1 | 1.89<br>347<br>8 | AP00<br>0812.<br>1 | 1.29<br>304<br>3 |
| TRBV<br>14     | 1.79<br>661<br>4 | TRAR<br>G1   | 7.66<br>605<br>5 | ADA<br>MTS       | 1.84<br>530<br>1 | CD69          | 1.75<br>819<br>8 | SIGL<br>EC7        | 1.71<br>331<br>7 | FOSL<br>1          | 1.40<br>013<br>2 |
| MYO<br>1F      | 1.39<br>178<br>8 | C16orf<br>54 | 1.83<br>449<br>1 | FMO<br>D         | 1.60<br>135<br>1 | BOC           | 1.47<br>407<br>3 | IGHD               | 3.02<br>500<br>1 | BMP<br>ER          | 1.85<br>977<br>6 |

|               |                  |                  |                  |                    |                  |                    |                  |                  |                  |                   |                  |
|---------------|------------------|------------------|------------------|--------------------|------------------|--------------------|------------------|------------------|------------------|-------------------|------------------|
| SSPN          | 1.34<br>208<br>5 | INPP5<br>D       | 1.14<br>635<br>9 | UNC<br>5C          | 1.53<br>120<br>2 | DCST<br>AMP        | 1.39<br>428<br>3 | CD74             | 1.42<br>205<br>9 | ALO<br>X5         | 1.12<br>646<br>1 |
| IL2R<br>A     | 2.11<br>947<br>9 | SLAM<br>F1       | 1.77<br>330<br>7 | CCL<br>5           | 1.99<br>519<br>2 | KLRB<br>1          | 1.59<br>885<br>1 | PDC<br>D1LG<br>2 | 2.06<br>250<br>7 | MIR1<br>55HG      | 1.72<br>515<br>8 |
| JPH2          | 1.92<br>918      | GLIPR<br>2       | 1.59<br>758<br>8 | PTP<br>N22         | 1.79<br>227<br>1 | CSF3<br>R          | 1.44<br>295<br>4 | CTS<br>W<br>3    | 1.70<br>877<br>3 | DPT               | 2.64<br>178<br>6 |
| WFD<br>C1     | 1.74<br>631<br>7 | AC002<br>091.1   | 1.65<br>697<br>2 | HK3                | 1.67<br>43       | C1QT<br>NF2        | 1.57<br>253<br>9 | IGLV<br>4-69     | 3.61<br>053<br>5 | SLC7<br>A8        | 1.31<br>012<br>6 |
| FCRL<br>3     | 2.35<br>091      | S100A<br>4       | 1.49<br>183<br>3 | LCP1               | 1.28<br>923<br>7 | TPSA<br>B1         | 1.82<br>324<br>2 | MS4<br>A4A       | 1.55<br>376<br>5 | MT1<br>M          | 1.21<br>925      |
| DOC<br>K10    | 1.22<br>542<br>2 | ADA<br>MTS1<br>2 | 1.63<br>854<br>8 | IGLV<br>3-19       | 2.97<br>39       | PCED<br>1B-<br>AS1 | 1.80<br>929<br>9 | RCS<br>D1        | 1.41<br>93       | IGHV<br>3-74      | 3.15<br>493<br>6 |
| TNFR<br>SF17  | 2.58<br>694<br>8 | HSPB<br>6        | 1.31<br>098<br>5 | APO<br>BEC<br>3H   | 1.40<br>348<br>2 | TCN1               | 1.94<br>844<br>4 | GAS1             | 2.08<br>523<br>3 | CRY<br>BB1        | 3.54<br>308<br>6 |
| LINC<br>02273 | 2.00<br>044<br>4 | PLN              | 2.97<br>168<br>8 | GIM<br>AP4         | 1.29<br>307<br>4 | RCA<br>N2          | 1.62<br>889<br>5 | SNC<br>A         | 1.23<br>866<br>6 | PCD<br>HGA<br>12  | 1.68<br>947<br>7 |
| MS4A<br>1     | 3.22<br>386<br>6 | TRAV<br>39       | 2.05<br>567<br>1 | RIPK<br>3          | 1.20<br>511<br>2 | UCP2               | 1.31<br>990<br>3 | CXC<br>L8        | 1.56<br>439<br>8 | CD96              | 1.74<br>874<br>4 |
| MEO<br>X1     | 1.91<br>868<br>5 | BMP5             | 2.01<br>017<br>9 | AL35<br>7054.      | 1.12<br>111<br>7 | FCN1               | 1.59<br>515<br>3 | PTGE<br>R4       | 1.26<br>051<br>6 | PDE1<br>A         | 1.58<br>769<br>8 |
| COL1<br>4A1   | 2.12<br>555<br>4 | DAPP<br>1        | 1.96<br>635      | CXC<br>L1          | 1.55<br>435<br>4 | CD4                | 1.07<br>991<br>8 | IGHG<br>4        | 2.38<br>557<br>7 | CSF1<br>R         | 1.59<br>070<br>5 |
| HLA-<br>DQB2  | 1.80<br>001<br>3 | LSP1             | 1.50<br>578<br>8 | AC1<br>0947<br>9.1 | 1.79<br>808<br>1 | DCLK<br>1          | 2.43<br>098<br>8 | GBP4             | 1.25<br>352<br>6 | HAN<br>D2-<br>AS1 | 2.64<br>553      |
| PDPN          | 2.82<br>973<br>7 | LINC0<br>0861    | 1.86<br>820<br>6 | ADC<br>Y7          | 1.12<br>586<br>5 | TRBV<br>7-3        | 2.17<br>124<br>2 | HLA-<br>DPA1     | 1.74<br>626<br>8 | ITGB<br>2         | 1.72<br>244<br>3 |
| FGL2          | 1.62<br>873<br>2 | SLAM<br>F8       | 2.00<br>059<br>5 | FOL<br>R2          | 1.39<br>723<br>8 | RASA<br>L3         | 1.40<br>969      | C7               | 2.42<br>048      | LGA<br>LS9        | 1.09<br>221<br>4 |
| GZM<br>H      | 1.48<br>586      | HLA-<br>DRB5     | 1.62<br>778      | APO<br>BEC         | 1.61<br>253      | MAR<br>CO          | 2.96<br>584      | GAP<br>T         | 2.08<br>426      | MFA<br>P4         | 2.59<br>656      |

|               |                  |              |                  |                    |                  |             |                  |                    |                  |                  |                  |
|---------------|------------------|--------------|------------------|--------------------|------------------|-------------|------------------|--------------------|------------------|------------------|------------------|
|               | 5                |              | 4                | 3C                 | 5                |             | 4                |                    | 4                |                  |                  |
| ABI3          | 1.28<br>883<br>5 | LYVE<br>1    | 1.07<br>531<br>9 | IGH<br>G1          | 2.61<br>784<br>8 | COL1<br>0A1 | 2.58<br>162<br>6 | LPAR<br>1          | 1.43<br>679<br>5 | CCL2<br>1        | 3.10<br>261<br>5 |
| SLC8<br>A1    | 1.49<br>010<br>1 | IGHV<br>3-30 | 2.58<br>540<br>9 | IGH<br>V3-<br>64   | 3.45<br>118<br>7 | KCN<br>K6   | 1.21<br>092<br>7 | IGSF<br>6          | 1.41<br>501<br>8 | CDH<br>11        | 1.95<br>100<br>1 |
| RNAS<br>E6    | 1.48<br>789<br>2 | CD53         | 1.85<br>157<br>6 | CXC<br>R2P1        | 1.87<br>984<br>4 | SMPD<br>3   | 1.26<br>672<br>7 | S100<br>A12        | 1.07<br>402<br>9 | PDZ<br>RN3       | 1.47<br>071<br>6 |
| AREG          | 1.31<br>359      | TRBV<br>15   | 2.20<br>489<br>4 | CD6                | 1.94<br>865<br>7 | CAR<br>MIL2 | 1.49<br>065<br>8 | CYP4<br>F29P       | 1.74<br>480<br>6 | UBA<br>SH3A      | 1.98<br>224<br>1 |
| MMP<br>25     | 1.35<br>936<br>9 | LCP2         | 1.58<br>633      | GSD<br>MA          | 1.63<br>703<br>8 | SLA         | 1.79<br>963<br>7 | OMG                | 3.97<br>756<br>2 | VAV1             | 1.72<br>281<br>9 |
| LST1          | 1.41<br>309<br>3 | TRAV<br>13-2 | 1.85<br>421<br>2 | ITG<br>A4          | 1.59<br>846<br>8 | FNDC<br>1   | 2.32<br>335<br>6 | AP00<br>2358.<br>2 | 1.24<br>807<br>7 | COL<br>EC10      | 2.00<br>392<br>7 |
| C5AR<br>1     | 1.15<br>039<br>1 | SFRP4        | 2.02<br>104<br>3 | IL34               | 1.22<br>356<br>4 | GPR1<br>8   | 1.82<br>653<br>5 | CPNE<br>5          | 1.32<br>883<br>5 | LINC<br>01914    | 1.18<br>924<br>6 |
| IGHV<br>1-45  | 2.67<br>679<br>9 | PTGD<br>R    | 1.37<br>483<br>6 | HRH<br>1           | 1.31<br>072<br>3 | MS4A<br>14  | 1.27<br>256      | ICOS               | 2.00<br>068<br>9 | BCL2<br>A1       | 1.57<br>516<br>6 |
| NAPS<br>B     | 1.72<br>578<br>2 | IGLV2<br>-28 | 2.51<br>568      | KLK<br>10          | 3.00<br>374      | STAP<br>1   | 1.86<br>636<br>3 | LILR<br>A2         | 1.42<br>892<br>7 | PLCB<br>2        | 1.46<br>135<br>1 |
| IGKV<br>3D-11 | 3.23<br>963<br>6 | ST8SI<br>A4  | 1.28<br>636<br>4 | IGLC<br>2          | 2.50<br>039      | ADR<br>A2A  | 2.10<br>754<br>1 | TRAV<br>12-3       | 2.01<br>250<br>5 | HLA-<br>DRB<br>1 | 1.71<br>946<br>1 |
| CD20<br>9     | 1.33<br>551<br>7 | HLA-<br>DPA3 | 1.31<br>476<br>6 | AC1<br>3506<br>8.2 | 3.41<br>711<br>1 | TRBV<br>19  | 2.13<br>605<br>2 | SLA2               | 1.74<br>637<br>1 | HTR<br>A4        | 1.98<br>645<br>5 |
| PTGI<br>R     | 1.63<br>432<br>3 | DOK3         | 1.20<br>519<br>2 | NTF<br>3           | 1.40<br>778<br>5 | EFNB<br>3   | 1.49<br>002<br>8 | ACA<br>P1          | 1.38<br>640<br>2 | C1QT<br>NF7      | 2.08<br>803<br>7 |
| PIK3C<br>D    | 1.64<br>376<br>1 | IGKV<br>2-30 | 3.19<br>128<br>5 | LCK                | 1.94<br>162<br>7 | MS4A<br>7   | 1.57<br>266<br>8 | TRB<br>V9          | 2.18<br>013<br>8 | AOA<br>H         | 1.69<br>710<br>3 |
| COX7<br>A1    | 2.03<br>673<br>8 | CLEC<br>4G   | 2.67<br>448<br>7 | IGHJ<br>2          | 2.49<br>797<br>8 | IL13R<br>A2 | 2.30<br>563<br>5 | IL11               | 4.00<br>937<br>8 | KCN<br>A3        | 2.11<br>511<br>1 |
| GZM           | 2.55             | IGKV         | 2.17             | SLC6               | 1.13             | CD30        | 1.41             | LILR               | 1.54             | CD1E             | 1.66             |



|                |                  |              |                  |                      |                  |                |                  |                   |                  |                  |                  |
|----------------|------------------|--------------|------------------|----------------------|------------------|----------------|------------------|-------------------|------------------|------------------|------------------|
| K              | 242<br>6         | 1-8          | 412<br>5         | A6                   | 348<br>3         | 0E             | 530<br>1         | B2                | 806<br>1         |                  | 155<br>4         |
| CCR4           | 1.93<br>912<br>7 | MXR<br>A8    | 1.84<br>780<br>5 | IL21<br>R            | 2.29<br>670<br>7 | F13A<br>1      | 1.81<br>126<br>1 | BIRC<br>3         | 1.41<br>309<br>5 | PRK<br>CB        | 1.70<br>616      |
| TBXA<br>S1     | 1.38<br>527<br>2 | CRHB<br>P    | 2.00<br>058      | KCN<br>E4            | 1.52<br>463<br>3 | IGKV<br>1-39   | 2.66<br>795<br>3 | FLT3              | 1.62<br>806<br>4 | TRG<br>C2        | 1.80<br>803<br>5 |
| SMIM<br>25     | 1.70<br>881<br>1 | EBI3         | 1.47<br>255      | IGH<br>V5-<br>78     | 1.63<br>961      | IGHV<br>3-7    | 2.75<br>899<br>6 | TNFS<br>F8        | 1.73<br>925<br>6 | CXC<br>R3        | 1.93<br>649      |
| MZB1           | 2.45<br>848<br>8 | LRRC<br>15   | 2.66<br>467      | BTL<br>A             | 2.11<br>593<br>3 | GAL<br>NT17    | 1.38<br>102<br>9 | SAA2<br>-<br>SAA4 | 1.68<br>350<br>3 | WIPF<br>1        | 1.29<br>936<br>8 |
| EGFL<br>6      | 1.38<br>72       | LRRK<br>1    | 1.27<br>713      | TRB<br>V12-<br>3     | 1.73<br>350<br>6 | RHO<br>H       | 1.46<br>961<br>6 | SELP<br>LG        | 1.76<br>345<br>7 | HAC<br>D4        | 1.38<br>018<br>2 |
| LY75           | 1.33<br>355<br>1 | ECM1         | 1.42<br>300<br>8 | SELP                 | 1.71<br>208<br>5 | LRRN<br>3      | 1.82<br>098<br>8 | GIM<br>AP1        | 1.26<br>586<br>2 | TNFA<br>IP8L2    | 1.42<br>868      |
| AC01<br>8755.4 | 1.71<br>836<br>2 | TRAV<br>26-1 | 2.25<br>332<br>6 | ATP2<br>A3           | 1.44<br>153<br>2 | EMIL<br>IN1    | 2.04<br>711<br>6 | GEM               | 1.86<br>235<br>8 | TRB<br>V20-<br>1 | 2.08<br>990<br>2 |
| IGKV<br>3D-15  | 3.64<br>296<br>3 | TME<br>M119  | 2.47<br>988<br>8 | FBL<br>N2            | 2.28<br>579<br>3 | AC01<br>8529.1 | 1.69<br>605<br>3 | IGKV<br>4-1       | 2.77<br>677<br>1 | TRA<br>V21       | 2.09<br>758<br>8 |
| SRGN           | 1.52<br>376      | SYNP<br>O2   | 1.54<br>388<br>9 | LOX<br>L1-<br>AS1    | 1.21<br>685<br>5 | FZD2           | 1.27<br>577<br>6 | SLC9<br>A9        | 1.47<br>437<br>9 | TME<br>M26       | 1.45<br>550<br>1 |
| TIMP<br>1      | 1.32<br>668<br>5 | SPIC         | 1.42<br>336<br>9 | HLA<br>-<br>DRB<br>9 | 1.63<br>325<br>4 | SH2D<br>1A     | 2.09<br>634<br>3 | CMK<br>LR1        | 1.61<br>315<br>7 | TRB<br>V7-9      | 2.23<br>941<br>3 |
| PRKC<br>Q      | 1.77<br>699      | RPL29<br>P19 | 1.80<br>064<br>2 | TRBJ<br>2-3          | 1.88<br>282<br>8 | IL7R           | 2.50<br>812<br>9 | OMD               | 2.60<br>142<br>4 | ITGA<br>9        | 1.42<br>560<br>4 |
| CEMI<br>P      | 1.20<br>492<br>1 | PLAU<br>R    | 1.52<br>900<br>6 | C1Q<br>A             | 1.68<br>391<br>2 | GAB3           | 1.41<br>236<br>6 | TRAV<br>13-1      | 2.41<br>986<br>4 | IGHV<br>1-18     | 2.82<br>845<br>9 |
| COL5<br>A1     | 1.82<br>570<br>4 | WISP1        | 1.47<br>908<br>2 | SEM<br>A4A           | 1.23<br>427      | NLRP<br>3      | 1.59<br>146<br>7 | DCN               | 2.60<br>177<br>1 | CXC<br>R6        | 1.98<br>485<br>1 |
| RUN<br>X3      | 1.70<br>867      | OSM          | 1.72<br>772      | CAL<br>HM6           | 2.07<br>267      | TNFR<br>SF13   | 1.68<br>669      | PRK<br>CQ-        | 1.16<br>615      | PRF1             | 1.49<br>695      |

|              |                  |                   |                  |                    |                  |                |                  |                    |                  |                   |                  |
|--------------|------------------|-------------------|------------------|--------------------|------------------|----------------|------------------|--------------------|------------------|-------------------|------------------|
|              |                  |                   | 8                |                    | 2                | C              | 1                | AS1                | 1                |                   | 5                |
| KLHL<br>4    | 1.36<br>292<br>7 | CREB<br>3L1       | 1.43<br>328<br>6 | IGLV<br>5-45       | 4.51<br>214<br>7 | EMP3           | 1.40<br>233<br>3 | ITGB<br>L1         | 1.63<br>987<br>6 | TRA<br>V17        | 2.02<br>135<br>5 |
| TRAV<br>8-6  | 2.03<br>425<br>3 | NCF1              | 1.88<br>739<br>2 | RRA<br>D           | 1.31<br>610<br>5 | GGTA<br>1P     | 1.20<br>483<br>8 | ADA<br>MDE<br>C1   | 2.97<br>267<br>9 | PLA2<br>G2D       | 3.22<br>519<br>6 |
| EGR2         | 1.63<br>589<br>6 | SYTL<br>3         | 1.49<br>723<br>2 | IGLV<br>6-57       | 3.18<br>776<br>9 | CALB<br>2      | 1.85<br>348<br>8 | TNFS<br>F13B       | 1.72<br>314<br>5 | POD<br>N          | 2.31<br>040<br>5 |
| IGHV<br>3-35 | 2.41<br>752<br>1 | IGHA<br>1         | 3.17<br>010<br>4 | ABR                | 1.15<br>67       | KCTD<br>12     | 1.59<br>548<br>6 | PLA2<br>R1         | 1.23<br>117<br>3 | HEP<br>H          | 1.60<br>056<br>5 |
| TRAV<br>9-2  | 2.18<br>235<br>3 | PLB1              | 1.30<br>138<br>7 | PLC<br>XD3         | 1.33<br>822<br>3 | SMO<br>C2      | 1.68<br>482<br>8 | CHI3<br>L2         | 2.27<br>361<br>8 | CIIT<br>A         | 1.43<br>634<br>9 |
| MCO<br>LN2   | 1.96<br>880<br>9 | TRAV<br>29DV<br>5 | 1.73<br>707      | C16o<br>rf89       | 4.86<br>587<br>3 | TIMD<br>4      | 2.12<br>026<br>5 | CD16<br>3          | 1.65<br>910<br>1 | VSIG<br>1         | 2.01<br>489      |
| SLIT2        | 1.94<br>479<br>4 | IGLV9<br>-49      | 2.75<br>628<br>7 | TRA<br>C           | 2.03<br>221<br>8 | IL18R<br>AP    | 1.42<br>228<br>5 | WDF<br>Y4          | 1.78<br>447<br>2 | COT<br>L1         | 1.59<br>079<br>6 |
| TRAV<br>5    | 2.00<br>111<br>5 | PLAC<br>9         | 2.01<br>707<br>2 | GNG<br>T2          | 1.33<br>785<br>8 | AL58<br>3785.1 | 1.10<br>242<br>4 | S1PR<br>4          | 1.79<br>430<br>7 | IGHV<br>1-<br>69D | 2.81<br>211<br>5 |
| DES          | 3.42<br>396<br>5 | CYBB              | 1.97<br>049<br>8 | GPR<br>C5A         | 2.14<br>629      | SOCS<br>3      | 1.39<br>610<br>3 | AC00<br>8759.<br>3 | 1.11<br>997<br>4 | CCB<br>E1         | 2.16<br>114<br>2 |
| VSIG<br>4    | 1.81<br>430<br>1 | FGR               | 1.38<br>787<br>1 | ICA<br>M3          | 1.81<br>923<br>6 | PLAC<br>8      | 1.96<br>144<br>7 | MAM<br>DC2         | 2.03<br>333<br>1 | IGFN<br>1         | 5.26<br>501<br>6 |
| TPSB<br>2    | 2.06<br>326<br>9 | TRBV<br>12-4      | 1.96<br>400<br>1 | AP00<br>0892.<br>3 | 1.44<br>789<br>3 | LINC<br>01094  | 1.53<br>732<br>4 | MPE<br>G1          | 1.47<br>301<br>9 | CCN<br>D2         | 1.15<br>734      |
| PNM<br>A2    | 1.55<br>659<br>6 | C1QT<br>NF1       | 1.45<br>971<br>6 | CD1<br>80          | 1.67<br>288<br>2 | APOB<br>EC3A   | 1.45<br>643<br>8 | IGHV<br>1-67       | 2.38<br>966<br>6 | CD70              | 2.57<br>142<br>2 |
| SELL         | 1.67<br>116<br>4 | DPEP<br>2         | 1.35<br>292      | LAM<br>A2          | 1.85<br>213<br>2 | CFD            | 1.36<br>974<br>2 | GNG<br>2           | 1.23<br>843      | TRB<br>C2         | 1.90<br>371<br>5 |
| NRRO<br>S    | 1.21<br>281<br>1 | LINC0<br>1943     | 1.35<br>269<br>3 | CD4<br>0LG         | 1.70<br>637      | P2RY<br>12     | 1.95<br>793<br>4 | TRIM<br>22         | 1.08<br>535<br>6 | DUO<br>X2         | 2.77<br>990<br>9 |
| THE          | 1.61             | DOK2              | 1.52             | RAB                | 1.73             | CD30           | 1.57             | GIM                | 1.14             | INSL              | 1.24             |

|                     |                  |                |                  |                  |                  |                |                  |               |                  |                    |                  |
|---------------------|------------------|----------------|------------------|------------------|------------------|----------------|------------------|---------------|------------------|--------------------|------------------|
| MIS2                | 788<br>8         |                | 564<br>4         | 33A              | 819<br>1         | 0C             | 234<br>2         | AP6           | 725<br>8         | 3                  | 431<br>9         |
| FPR3                | 1.75<br>422<br>3 | IGHV<br>4-61   | 2.72<br>033      | ELN              | 1.46<br>457<br>7 | APOB<br>EC3G   | 1.35<br>703      | IGLV<br>1-44  | 2.70<br>124<br>7 | CD3E               | 2.04<br>789<br>7 |
| PROC<br>R           | 1.08<br>441      | LY86           | 1.57<br>045<br>3 | TRB<br>V13       | 2.11<br>592<br>6 | SIRP<br>B2     | 1.81<br>961<br>7 | DGK<br>A      | 1.11<br>497<br>7 | SIGL<br>EC14       | 1.89<br>016      |
| GPRI<br>N3          | 1.09<br>409<br>2 | CXCL<br>11     | 1.42<br>142<br>5 | TRB<br>V30       | 1.13<br>693<br>9 | XCR1           | 2.56<br>054<br>8 | TRAV<br>8-3   | 2.26<br>123<br>9 | IGHV<br>1-58       | 4.44<br>123<br>2 |
| ZBP1                | 2.00<br>200<br>2 | AC109<br>446.3 | 1.51<br>624<br>2 | C1Q<br>B         | 1.80<br>293<br>6 | TMIG<br>D2     | 1.44<br>566      | TRB<br>V11-2  | 2.10<br>925<br>1 | WDR<br>86          | 1.70<br>162<br>3 |
| TNFR<br>SF8         | 1.78<br>264<br>4 | GCSA<br>M      | 1.44<br>234<br>8 | PTGI<br>S        | 2.24<br>150<br>5 | IGLV<br>2-11   | 3.19<br>938      | SIGL<br>EC1   | 1.49<br>217<br>2 | KLH<br>L6          | 1.71<br>809<br>3 |
| AIF1                | 1.44<br>482<br>6 | CDH3           | 2.20<br>962<br>1 | IGH<br>V4-<br>34 | 2.29<br>869<br>3 | COL1<br>A2     | 1.97<br>046<br>7 | FCM<br>R      | 1.78<br>579<br>8 | TME<br>M158        | 1.85<br>198<br>7 |
| SPOC<br>D1          | 1.32<br>968<br>4 | AC012<br>645.3 | 1.48<br>459<br>7 | EOM<br>ES        | 1.95<br>774<br>7 | IL16           | 1.41<br>759<br>4 | IL24          | 1.55<br>528<br>6 | IGHV<br>3-48       | 2.97<br>411<br>9 |
| NFA<br>M1           | 1.77<br>990<br>9 | CDX1           | 1.26<br>114<br>8 | TRG-<br>AS1      | 1.61<br>705<br>6 | EVI2<br>A      | 1.66<br>154<br>6 | VILL          | 1.07<br>443<br>6 | GFR<br>A2          | 1.34<br>512      |
| CD84                | 1.78<br>784<br>5 | TRAV<br>20     | 2.48<br>927<br>5 | CLE<br>C5A       | 1.56<br>222<br>2 | CD86           | 1.60<br>701<br>4 | CCL1<br>8     | 1.52<br>371<br>5 | ARL1<br>1          | 1.38<br>688<br>6 |
| IGHV<br>3OR1<br>6-9 | 2.98<br>914<br>2 | TRAV<br>12-2   | 2.13<br>515<br>7 | OLF<br>ML2<br>B  | 1.58<br>330<br>6 | TRAV<br>8-4    | 2.08<br>648      | IGKV<br>2D-40 | 4.43<br>225      | CD52               | 1.91<br>45       |
| COL1<br>6A1         | 1.61<br>321<br>1 | AC004<br>847.1 | 1.65<br>247<br>6 | TCL<br>1A        | 2.63<br>752      | LINC<br>02084  | 1.78<br>799      | HAM<br>P      | 1.90<br>044      | CELF<br>2          | 1.85<br>301<br>3 |
| CORO<br>1A          | 1.76<br>505<br>9 | IGKV<br>5-2    | 2.69<br>090<br>1 | LPA<br>R5        | 1.53<br>76       | MAP4<br>K1     | 1.59<br>359<br>2 | KLH<br>DC7B   | 1.37<br>340<br>2 | AC02<br>7031.<br>2 | 1.70<br>231<br>1 |
| SAM<br>D9           | 1.05<br>568<br>5 | CRISP<br>LD1   | 1.53<br>257<br>2 | LTF              | 1.48<br>310<br>6 | AC01<br>1899.2 | 1.28<br>196<br>4 | IGKV<br>3-15  | 3.08<br>325<br>1 | EPH<br>A3          | 2.13<br>734<br>3 |
| CXCL<br>9           | 2.21<br>533<br>5 | FMN1           | 1.27<br>751<br>1 | ADG<br>RE1       | 2.13<br>501<br>8 | POST<br>N      | 2.08<br>238<br>4 | CSF2<br>RB    | 1.77<br>534<br>3 | IGKV<br>6-21       | 4.43<br>168<br>7 |

|                      |                  |                      |                  |                      |                  |                  |                  |                    |                  |                    |                  |
|----------------------|------------------|----------------------|------------------|----------------------|------------------|------------------|------------------|--------------------|------------------|--------------------|------------------|
| SPTS<br>SB           | 1.56<br>24       | IGHV<br>6-1          | 2.94<br>804<br>7 | AL07<br>8590.<br>3   | 1.12<br>233<br>1 | IGLV<br>2-18     | 1.96<br>369<br>7 | MGP                | 1.75<br>187<br>7 | NLR<br>C3          | 1.41<br>163<br>1 |
| LSAM<br>P            | 1.27<br>995      | CLEC<br>10A          | 1.32<br>439      | FAP                  | 2.17<br>969<br>6 | TRBV<br>24-1     | 2.26<br>985<br>5 | IGKV<br>3-20       | 2.50<br>730<br>4 | GPR3<br>4          | 1.27<br>549<br>9 |
| CTSK                 | 3.05<br>043<br>9 | NCKA<br>PIL          | 1.75<br>566<br>5 | PAM<br>R1            | 1.78<br>593<br>9 | KLHL<br>30       | 1.48<br>197<br>9 | PREL<br>P          | 2.37<br>444<br>5 | P2RY<br>13         | 1.75<br>545<br>4 |
| TRBV<br>5-4          | 2.08<br>554<br>3 | IL10                 | 1.97<br>545<br>8 | EVI2<br>B            | 1.80<br>142<br>5 | CMT<br>M2        | 1.19<br>737<br>4 | RYR1               | 1.55<br>686<br>5 | IGKV<br>3-7        | 2.99<br>501<br>6 |
| IGHV<br>2-70D        | 3.27<br>664<br>7 | AL034<br>397.3       | 1.55<br>362<br>7 | EGR<br>3             | 1.52<br>369<br>8 | TME<br>M200<br>A | 1.69<br>837<br>5 | IGKV<br>1-12       | 2.87<br>906<br>3 | MYL<br>9           | 2.07<br>684      |
| LINC<br>01150        | 1.38<br>010<br>6 | IKZF1                | 1.88<br>450<br>9 | SIGL<br>EC8          | 1.96<br>685<br>8 | PSTPI<br>P1      | 1.58<br>811      | ICA<br>M1          | 1.06<br>287<br>9 | AC01<br>5911.<br>3 | 1.76<br>512<br>6 |
| IGHV<br>3OR1<br>6-13 | 2.82<br>804<br>1 | LXN                  | 1.63<br>010<br>4 | VEN<br>TX            | 1.09<br>823<br>1 | SRPX             | 2.89<br>415<br>1 | AC00<br>4687.<br>1 | 1.58<br>740<br>9 | TRB<br>V7-6        | 2.10<br>225<br>4 |
| IGHV<br>3-19         | 3.27<br>747<br>1 | TRBV<br>10-3         | 2.01<br>902<br>4 | HLA<br>-<br>DOA      | 2.00<br>389<br>7 | ARH<br>GDIB      | 1.24<br>642<br>4 | SLC7<br>A7         | 1.30<br>038<br>1 | LINC<br>00892      | 1.50<br>146<br>8 |
| TMPR<br>SS4          | 2.91<br>290<br>5 | IGHV<br>1-3          | 2.79<br>720<br>1 | COL<br>1A1           | 2.00<br>724<br>1 | CCR1             | 1.54<br>121<br>8 | PTPR<br>C          | 1.97<br>765<br>1 | IPCE<br>F1         | 1.56<br>492<br>4 |
| FDCS<br>P            | 1.35<br>044<br>5 | MMP7                 | 2.33<br>924<br>2 | GST<br>M5            | 1.38<br>135<br>7 | NCF1<br>C        | 1.60<br>354<br>3 | JCHA<br>IN         | 2.76<br>355<br>8 | IGKV<br>2D-<br>24  | 2.85<br>175<br>9 |
| FASL<br>G            | 1.82<br>143<br>6 | RTN1                 | 1.19<br>350<br>6 | ADA<br>2             | 1.19<br>898<br>6 | P2RX<br>1        | 1.71<br>291<br>4 | LILR<br>A1         | 1.35<br>625<br>7 | IGHG<br>P          | 2.98<br>543<br>6 |
| ANK2                 | 1.54<br>797<br>6 | IGKV<br>1-16         | 2.55<br>656<br>5 | HLA<br>-<br>DQB<br>1 | 1.79<br>238<br>3 | AC01<br>5911.7   | 1.72<br>659<br>8 | LINC<br>01615      | 1.98<br>820<br>5 | LILR<br>B5         | 1.21<br>450<br>7 |
| CLMP                 | 1.78<br>213      | SIRPG                | 1.83<br>839<br>7 | CEA<br>CAM<br>6      | 2.69<br>960<br>4 | LAIR<br>1        | 1.54<br>315<br>5 | RNU<br>4-62P       | 1.42<br>850<br>6 | LILR<br>A5         | 1.58<br>151      |
| SFRP<br>1            | 2.40<br>455<br>2 | IGKV<br>3OR2-<br>268 | 1.96<br>407<br>3 | LINC<br>0228<br>5    | 1.35<br>524<br>5 | AC24<br>5128.3   | 1.70<br>252<br>6 | AC00<br>4585.<br>1 | 2.09<br>28       | IGHV<br>3-72       | 3.04<br>238<br>5 |
| ARH                  | 1.54             | GZM                  | 1.79             | AC0                  | 1.37             | IGHV             | 1.80             | PLD4               | 1.49             | PTGS               | 1.89             |

|            |          |            |          |            |          |           |          |            |          |           |          |
|------------|----------|------------|----------|------------|----------|-----------|----------|------------|----------|-----------|----------|
| GAP30      | 7029     | A          | 983      | 08105.3    | 0859     | 7-81      | 5645     |            | 7204     | 2         | 0138     |
| TRDV1      | 2.609861 | C11orf21   | 1.531822 | IGKC       | 2.836288 | PRRX1     | 1.626222 | C3AR1      | 1.512788 | CRPP1     | 1.307358 |
| C1QC       | 1.695954 | TRBV18     | 1.994116 | HAND2      | 2.76267  | LINC01857 | 2.177317 | POU2AF1    | 1.780768 | SPIB      | 1.739411 |
| TRBV5-1    | 2.132398 | CD27       | 2.194958 | FCGR2A     | 1.333484 | IGHV3-15  | 3.405438 | GPR68      | 1.75152  | TLR2      | 1.147651 |
| IL10RA     | 1.555517 | DACT1      | 1.278637 | LTP2       | 1.647119 | IGHG2     | 3.214813 | CD300A     | 1.427742 | CD177     | 3.011076 |
| FCER2      | 2.0211   | GIMAP7     | 1.0914   | HLA-DMB    | 1.674165 | ASB2      | 1.783387 | SYK        | 1.41717  | SEMA4D    | 1.234038 |
| GLI3       | 1.528462 | FGF7       | 2.499792 | WISP2      | 2.805275 | INTS6L    | 1.154337 | AC015819.1 | 1.307339 | GVINP1    | 1.626248 |
| IGKV2D-29  | 2.618559 | AC090559.1 | 1.540693 | TAGAP      | 1.899712 | IGHV3-33  | 3.349049 | SIT1       | 1.978719 | PRA M1    | 1.354916 |
| ADAM33     | 1.837252 | IGHV3-63   | 1.481165 | AL031846.1 | 1.472813 | TLR7      | 1.915069 | LINC01480  | 1.580077 | MGA T3    | 1.395534 |
| FSTL3      | 1.107366 | GAL3ST4    | 1.825669 | SIDT1      | 1.228792 | IGLV2-8   | 3.714585 | SPOCK2     | 1.343944 | C14orf180 | 1.415586 |
| LRRC17     | 1.267248 | PTN        | 1.935031 | CD48       | 1.968469 | NDRG4     | 1.770442 | TRBV6-1    | 1.913145 | TWIS T1   | 2.202654 |
| INPP4B     | 1.351267 | CHIT1      | 3.764407 | GPR65      | 1.751135 | TMEM173   | 1.547338 | SLAMF7     | 2.255376 | IL1B      | 1.517349 |
| AC142381.1 | 3.023204 | GREM1      | 1.363277 | STRA6      | 1.602313 | IGLV8-61  | 3.440634 | SYNDIG1    | 1.577552 | IGHV1-2   | 3.724027 |
| POU2F2     | 1.593397 | COL6A1     | 1.313795 | GNA15      | 1.436492 | GFPT2     | 2.002753 | HAVCR2     | 1.562833 | ARHGAP25  | 1.271364 |
| CXCR1      | 1.581905 | GLIPR1     | 1.241136 | FTH1P22    | 2.018011 | LINC01679 | 1.507177 | HSPB2      | 1.846561 | CCR5      | 2.038009 |

|                   |                  |              |                  |                    |                  |                    |                  |              |                  |                    |                  |
|-------------------|------------------|--------------|------------------|--------------------|------------------|--------------------|------------------|--------------|------------------|--------------------|------------------|
| CD3G              | 1.92<br>384<br>8 | IGHJ3        | 3.01<br>744<br>5 | ZBE<br>D2          | 2.22<br>659<br>2 | PTHL<br>H          | 1.28<br>035<br>6 | IGLV<br>3-25 | 2.77<br>269<br>1 | SPN                | 1.78<br>941      |
| LY9               | 1.95<br>524<br>6 | PRUN<br>E2   | 1.80<br>722<br>6 | GPR<br>174         | 2.33<br>319      | IGHG<br>3          | 2.59<br>277<br>5 | CST7         | 1.73<br>166<br>6 | AIM2               | 2.57<br>512<br>5 |
| SGCA              | 2.01<br>688<br>9 | IGLV1<br>-51 | 2.73<br>175<br>8 | AC0<br>2503<br>1.1 | 1.15<br>467<br>5 | PLA2<br>G4A        | 1.48<br>360<br>4 | FAM1<br>29A  | 1.53<br>822<br>8 | ADG<br>RE2         | 1.77<br>143<br>9 |
| TRPV<br>6         | 1.37<br>109<br>4 | RAB3<br>1    | 1.36<br>648<br>1 | TRB<br>V3-1        | 2.37<br>789<br>6 | CD72               | 1.62<br>147<br>1 | IL6          | 1.47<br>589      | LAX<br>1           | 1.72<br>670<br>7 |
| BIN2              | 1.59<br>172<br>4 | ALOX<br>5AP  | 1.84<br>130<br>5 | SNX<br>20          | 1.85<br>756<br>1 | CLEC<br>4E         | 1.99<br>277      | CD8<br>A     | 2.13<br>436<br>1 | IGKV<br>2-29       | 1.93<br>397      |
| AL13<br>5818.1    | 1.51<br>278<br>6 | ARHG<br>AP9  | 1.65<br>561      | FBN<br>1           | 1.49<br>824      | GPR1<br>71         | 1.95<br>875<br>4 | TRAV<br>2    | 2.14<br>415<br>3 | FOX<br>F1          | 1.61<br>601<br>6 |
| EMILI<br>N2       | 1.19<br>763<br>6 | S100B        | 1.13<br>481<br>5 | GPX<br>8           | 1.29<br>337<br>3 | HNR<br>NPA1<br>P21 | 1.70<br>636<br>2 | TMS<br>B4X   | 1.04<br>894<br>3 | IGLV<br>1-50       | 1.84<br>316<br>5 |
| SLFN<br>12L       | 1.77<br>461<br>3 | IGKV<br>1-5  | 2.89<br>450<br>4 | COL<br>3A1         | 2.15<br>994<br>1 | IGHV<br>1-12       | 2.76<br>467<br>2 | HCK          | 1.68<br>889<br>3 | ADA<br>M12         | 1.26<br>901<br>8 |
| CRTA<br>C1        | 5.53<br>268<br>5 | PMP2<br>2    | 1.46<br>125<br>2 | XYL<br>T1          | 1.49<br>449<br>1 | MMP<br>9           | 1.34<br>061<br>6 | MSR<br>1     | 1.41<br>624<br>1 | ISLR               | 2.84<br>187<br>3 |
| CSF2<br>RA        | 1.11<br>180<br>1 | GPNM<br>B    | 2.20<br>729<br>8 | ITG<br>A3          | 1.42<br>609<br>1 | HAPL<br>N3         | 1.87<br>219<br>4 | PIK3<br>R5   | 1.56<br>458<br>9 | GNB<br>4           | 1.22<br>482<br>3 |
| LTA               | 1.84<br>7        | PRDM<br>1    | 1.37<br>830<br>7 | IGLV<br>3-21       | 3.09<br>011<br>4 | OSCA<br>R          | 1.42<br>712<br>6 | CD80         | 1.83<br>331<br>8 | SIGL<br>EC11       | 1.35<br>249<br>7 |
| FCRL<br>6         | 1.35<br>454<br>2 | RASG<br>RP1  | 1.80<br>806<br>2 | IGH<br>V1-<br>24   | 3.27<br>548<br>9 | CD30<br>OLF        | 1.52<br>879<br>6 | CLEC<br>1B   | 3.09<br>603<br>7 | IGLV<br>1-40       | 3.18<br>948<br>5 |
| MUC1              | 1.83<br>145<br>4 | CD22         | 1.67<br>378<br>9 | MEI1               | 1.66<br>910<br>1 | HAS1               | 2.45<br>854<br>6 | ADT<br>RP    | 1.37<br>637<br>3 | TESP<br>A1         | 2.03<br>347<br>6 |
| TRAV<br>14DV<br>4 | 2.10<br>275<br>3 | LYPD<br>5    | 1.23<br>858<br>8 | IGLC<br>6          | 2.38<br>355<br>1 | CR1                | 2.36<br>465<br>5 | CD38         | 1.77<br>060<br>6 | AC10<br>0803.<br>2 | 1.65<br>539<br>2 |
| CPA3              | 1.44<br>734      | PI16         | 2.42<br>225      | SIRP<br>B1         | 1.75<br>785      | COL8<br>A2         | 1.70<br>916      | IGHV<br>5-51 | 2.76<br>703      | MIAT               | 2.30<br>037      |

|                  |                  |                |                  |                    |                  |                   |                  |                    |                  |                    |                  |
|------------------|------------------|----------------|------------------|--------------------|------------------|-------------------|------------------|--------------------|------------------|--------------------|------------------|
|                  | 7                |                | 3                |                    | 5                |                   | 6                |                    | 9                |                    | 1                |
| HCLS<br>1        | 1.60<br>809      | CHST<br>2      | 1.41<br>724      | ACK<br>R1          | 2.27<br>706<br>1 | IRAK<br>3         | 1.25<br>500<br>4 | INMT               | 2.08<br>016<br>7 | AL59<br>0483.<br>2 | -<br>1.88<br>135 |
| TM6S<br>F1       | 1.51<br>489<br>3 | ABI3B<br>P     | 1.66<br>592<br>4 | BHL<br>HE22        | 1.88<br>378<br>3 | SCGB<br>3A1       | 1.08<br>744<br>8 | FYB1               | 1.92<br>113<br>2 | ABH<br>D1          | -<br>1.48<br>554 |
| FAM1<br>67A      | 1.30<br>494<br>6 | SIGLE<br>C9    | 1.62<br>436<br>6 | DSE                | 1.35<br>291<br>1 | AP00<br>2954.1    | 1.65<br>644<br>1 | CAM<br>KK1         | 1.17<br>446<br>1 | CTN<br>NA2         | -<br>1.71<br>756 |
| HS3S<br>T2       | 1.44<br>937<br>5 | CD1B           | 2.12<br>158<br>4 | STA<br>B1          | 1.16<br>756<br>9 | TSHZ<br>3         | 1.48<br>678<br>8 | PLEK<br>HO2        | 1.10<br>024<br>4 | GRE<br>B1          | -<br>1.31<br>633 |
| BLK              | 1.49<br>616<br>1 | AC145<br>098.1 | 1.18<br>801<br>5 | PILR<br>A          | 1.29<br>093<br>7 | IKZF3             | 1.83<br>050<br>1 | THBS<br>2          | 2.18<br>160<br>2 | AC10<br>4088.<br>1 | -<br>1.75        |
| IGHV<br>3-38     | 2.30<br>708<br>9 | GPSM<br>3      | 1.47<br>832<br>7 | IGK<br>V3-<br>11   | 2.93<br>285      | CD2               | 2.01<br>792<br>7 | CCR7               | 2.25<br>241<br>8 | AC09<br>8934.<br>2 | -<br>1.19<br>748 |
| HTRA<br>3        | 1.55<br>798<br>3 | IGHM           | 2.83<br>950<br>8 | HBD                | 2.29<br>415<br>6 | PYG<br>M          | 1.52<br>274<br>7 | C6orf<br>222       | 1.41<br>972<br>7 | AC01<br>0501.<br>1 | -<br>1.33<br>218 |
| RGS1<br>8        | 1.54<br>387<br>7 | GGT5           | 1.90<br>574<br>7 | IGFB<br>P6         | 1.55<br>310<br>6 | BTK               | 1.69<br>172<br>7 | CLEC<br>4A         | 1.16<br>219<br>7 | AC11<br>4947.<br>1 | -<br>1.33<br>123 |
| CAM<br>K4        | 1.58<br>464<br>2 | JAKM<br>IP1    | 1.76<br>236<br>1 | C11o<br>rf96       | 1.46<br>000<br>9 | MAP1<br>A         | 1.97<br>533<br>2 | EPB4<br>1L3        | 1.63<br>632<br>1 | AC23<br>1981.<br>1 | -<br>1.13<br>35  |
| RAC2             | 1.54<br>764<br>6 | TNXB           | 1.79<br>084<br>9 | AC0<br>1591<br>1.8 | 1.97<br>638<br>1 | LINC<br>01871     | 1.63<br>390<br>6 | FOXS<br>1          | 1.39<br>825<br>1 | LGR5               | -<br>1.55<br>644 |
| CLEC<br>7A       | 1.77<br>848<br>5 | CRISP<br>LD2   | 1.90<br>808<br>9 | NCF<br>1B          | 1.79<br>009<br>4 | TRAV<br>16        | 2.02<br>321<br>5 | AL16<br>1935.<br>3 | 1.23<br>588<br>9 | PAGE<br>4          | -<br>1.77<br>836 |
| GPR8<br>4        | 2.14<br>995<br>4 | GNG8           | 1.44<br>628<br>1 | IGH<br>V4-<br>59   | 2.27<br>014<br>5 | WDR<br>86-<br>AS1 | 1.26<br>567<br>5 | LILR<br>B4         | 1.87<br>423<br>6 | AOX<br>3P          | -<br>1.14<br>283 |
| TOM<br>M20P<br>2 | 1.51<br>614      | PDE6<br>G      | 1.33<br>398<br>8 | TRB<br>V4-2        | 2.06<br>422<br>3 | CXCL<br>12        | 1.45<br>904<br>6 | NMU<br>R1          | 1.29<br>098<br>6 | KCN<br>U1          | -<br>1.69<br>174 |
| GZM<br>M         | 1.37<br>817<br>8 | SCIM<br>P      | 1.67<br>526<br>9 | DUO<br>XA2         | 2.33<br>724<br>9 | EMB               | 1.92<br>507<br>8 | TNFS<br>F18        | 1.13<br>318<br>1 | RHB<br>DL3         | -<br>2.18<br>423 |
| CD79             | 2.71             | PI3            | 2.08             | CR2                | 3.71             | LINC              | 1.28             | 1-Mar              | 1.24             | RAS                | -                |

|               |                  |                |                  |                  |                  |               |                  |              |                  |                    |                  |
|---------------|------------------|----------------|------------------|------------------|------------------|---------------|------------------|--------------|------------------|--------------------|------------------|
| A             | 435<br>4         |                | 692<br>2         |                  | 985<br>6         | 00426         | 326<br>9         |              | 382<br>9         | L10B               | 1.79<br>163      |
| CLEC<br>2B    | 1.33<br>265<br>9 | ANTX<br>R1     | 1.79<br>568<br>8 | CYS<br>LTR1      | 1.29<br>817<br>5 | LINC<br>01133 | 2.69<br>396<br>6 | TMC<br>8     | 1.58<br>935<br>2 | DNA<br>JB3         | -<br>1.39<br>467 |
| DOC<br>K8     | 1.18<br>395<br>9 | TRAV<br>19     | 2.26<br>379      | TRB<br>V28       | 1.98<br>938<br>4 | SVEP<br>1     | 2.26<br>877      | MYE<br>OV    | 2.97<br>135<br>3 | LINC<br>01970      | -<br>1.48<br>494 |
| TBX2<br>1     | 1.46<br>133<br>2 | FGD2           | 1.41<br>06       | GPM<br>6A        | 1.77<br>504<br>4 | PCDH<br>7     | 2.08<br>905<br>8 | TLR1<br>0    | 1.72<br>654<br>1 | AC01<br>1747.<br>1 | -<br>1.58<br>52  |
| SASH<br>3     | 1.81<br>625<br>7 | CRTA<br>M      | 2.14<br>256<br>4 | IGH<br>V3-<br>21 | 2.79<br>513<br>1 | IL2R<br>B     | 1.79<br>115<br>7 | TYR<br>OBP   | 1.41<br>624<br>2 | AC02<br>6765.<br>2 | -<br>1.68<br>538 |
| CD1C          | 1.45<br>514<br>9 | LILR<br>A4     | 1.69<br>392<br>5 | CYTI<br>P        | 1.69<br>315<br>4 | IGKV<br>1D-43 | 2.63<br>857<br>9 | TRB<br>V2    | 2.11<br>112<br>2 | RNF4<br>3          | -<br>1.15<br>277 |
| CLEC<br>12A   | 1.83<br>745<br>1 | FAM1<br>63B    | 2.15<br>600<br>3 | MT1<br>L         | 1.14<br>337<br>5 | IL18B<br>P    | 1.33<br>826      | NCR1         | 1.51<br>119<br>7 | IQCH               | -<br>1.17<br>561 |
| IGKV<br>1D-42 | 4.82<br>536<br>3 | MRC2           | 1.81<br>025<br>8 | NDN<br>F         | 3.20<br>397<br>9 | IGLV<br>10-54 | 4.44<br>073      | CHR<br>NA1   | 3.74<br>769<br>1 | AC00<br>8549.<br>1 | -<br>1.30<br>317 |
| CCR2          | 1.62<br>494<br>4 | C1orf1<br>62   | 1.49<br>071<br>8 | CEA<br>CAM<br>4  | 1.62<br>763<br>8 | CD5           | 2.04<br>059<br>2 | IGHV<br>4-55 | 2.65<br>886<br>9 | RNU<br>6-46P       | -<br>1.23<br>746 |
| SAA1          | 1.68<br>003<br>8 | IL1RL<br>1     | 1.82<br>593<br>5 | HCG<br>11        | 1.40<br>476<br>6 | CXCL<br>3     | 1.42<br>782<br>6 | IDO1         | 1.27<br>037<br>2 | MIR3<br>25HG       | -<br>1.40<br>529 |
| WNT1<br>0A    | 1.84<br>59       | GPBA<br>R1     | 1.90<br>108<br>6 | PLA<br>U         | 1.86<br>425<br>1 | MILR<br>1     | 1.41<br>197      | CD19         | 1.72<br>065<br>4 | SP5                | -<br>1.35<br>922 |
| CD33          | 1.48<br>063<br>6 | LINC0<br>0996  | 1.49<br>343<br>4 | LUM              | 2.74<br>670<br>3 | MS4A<br>4E    | 1.21<br>653<br>5 | RAS<br>GRP4  | 1.22<br>781<br>4 | LINC<br>02587      | -<br>2.14<br>413 |
| FGD3          | 1.11<br>450<br>4 | FCGR<br>3A     | 1.52<br>951<br>7 | CD3<br>7         | 1.70<br>895<br>5 | CCL1<br>9     | 3.85<br>890<br>8 | GDF6         | 1.54<br>642<br>3 | PHY<br>HIPL        | -<br>1.13<br>104 |
| IGHV<br>3-73  | 3.93<br>151<br>2 | AC134<br>043.2 | 1.31<br>968<br>9 | IFI44<br>L       | 1.29<br>017<br>9 | NGFR          | 1.87<br>033<br>6 | SAM<br>D9L   | 1.41<br>346<br>3 | ACT<br>N2          | -<br>1.72<br>635 |
| TSPA<br>N32   | 1.29<br>153<br>5 | MMP1<br>9      | 1.00<br>368<br>8 | DOC<br>K2        | 1.81<br>287<br>2 | SAMS<br>N1    | 1.81<br>394<br>3 | PTCH<br>2    | 1.48<br>423<br>7 | AC00<br>7277.<br>1 | -<br>1.89<br>145 |



|                |                  |                      |                  |                      |                  |                |                  |                    |                  |                    |                  |
|----------------|------------------|----------------------|------------------|----------------------|------------------|----------------|------------------|--------------------|------------------|--------------------|------------------|
| FAM7<br>8A     | 1.29<br>877<br>9 | TRBJ2<br>-1          | 1.89<br>560<br>5 | SPI1                 | 1.52<br>328<br>8 | ZG16<br>B      | 1.24<br>554<br>6 | IGHV<br>2-5        | 2.84<br>349<br>8 | AC01<br>0531.<br>5 | -<br>1.19<br>432 |
| FCN3           | 1.95<br>266<br>8 | AC243<br>960.1       | 1.68<br>898<br>5 | MAL                  | 2.21<br>536<br>6 | TRAF<br>3IP3   | 1.71<br>939<br>3 | AL36<br>5361.<br>1 | 1.97<br>595<br>2 | ACS<br>L6          | -<br>1.40<br>132 |
| CXCL<br>5      | 1.78<br>797<br>6 | THEM<br>IS           | 2.11<br>096<br>9 | CD2<br>47            | 1.56<br>993<br>1 | IL12R<br>B1    | 1.69<br>602<br>4 | ITGB<br>6          | 1.97<br>240<br>6 | AC11<br>3404.<br>1 | -<br>1.32<br>862 |
| PTGE<br>R3     | 1.49<br>287<br>3 | TRBV<br>29-1         | 2.31<br>192<br>1 | PLE<br>KHS<br>1      | 2.01<br>322<br>7 | FCGR<br>1A     | 2.04<br>509<br>5 | IGHV<br>2-26       | 3.26<br>405<br>7 | AC06<br>9294.<br>1 | -<br>1.54<br>166 |
| KCN<br>N4      | 2.21<br>325<br>9 | TRGV<br>7            | 1.61<br>328<br>8 | BCL<br>11B           | 1.69<br>669<br>9 | AP00<br>5019.1 | 1.72<br>829<br>8 | IGHV<br>3-11       | 3.57<br>489<br>3 | LINC<br>01124      | -<br>1.34<br>15  |
| TRAV<br>12-1   | 2.29<br>756<br>8 | HLA-<br>DQB1<br>-AS1 | 1.64<br>086<br>8 | TLR<br>8             | 2.26<br>887<br>4 | TRBC<br>1      | 2.03<br>025<br>3 | MT1F               | 1.01<br>945<br>7 | AL16<br>3953.<br>1 | -<br>1.50<br>539 |
| SHIS<br>A3     | 2.63<br>904<br>4 | IFI16                | 1.16<br>721<br>5 | GPR<br>182           | 1.85<br>402<br>3 | IL2R<br>G      | 1.70<br>778<br>4 | CDH<br>17          | 1.84<br>265<br>5 | C5orf<br>66        | -<br>1.25<br>871 |
| BAN<br>K1      | 2.39<br>932<br>1 | RUBC<br>NL           | 1.60<br>016<br>5 | WNT<br>2             | 3.28<br>809<br>1 | AC00<br>2398.2 | 2.17<br>532<br>3 | ZAP7<br>0          | 1.55<br>535<br>7 | NOT<br>UM          | -<br>1.55<br>725 |
| AC11<br>0995.1 | 1.26<br>334<br>9 | PTAF<br>R            | 1.37<br>606<br>7 | AC1<br>1552<br>2.1   | 1.44<br>389<br>2 | TRE<br>M2      | 1.28<br>234<br>3 | MIR8<br>071-2      | 2.50<br>469<br>2 | HLF                | -<br>1.13<br>434 |
| GATA<br>3      | 1.41<br>308<br>4 | CLEC<br>11A          | 1.77<br>684<br>3 | LYL1                 | 1.14<br>113<br>6 | HLA-<br>DRA    | 1.67<br>920<br>8 | CLEC<br>9A         | 1.70<br>670<br>3 | TECT<br>B          | -<br>1.21<br>056 |
| AC02<br>2730.4 | 1.27<br>071<br>3 | TRBJ2<br>-7          | 1.93<br>068<br>6 | LINC<br>0254<br>4    | 2.05<br>254<br>4 | CCL1<br>1      | 2.32<br>615<br>3 | HLA-<br>DRB6       | 1.62<br>671<br>9 | AC01<br>3244.<br>1 | -<br>1.26<br>814 |
| CHN1           | 1.20<br>578<br>3 | DNM3<br>OS           | 1.59<br>281<br>4 | RAS<br>SF2           | 1.64<br>080<br>9 | CFP            | 1.61<br>747<br>1 | DNAJ<br>C5B        | 1.77<br>227<br>2 | AC00<br>7406.<br>2 | -<br>1.28<br>26  |
| FCGR<br>1CP    | 2.01<br>136<br>6 | EFEM<br>P1           | 1.88<br>121<br>9 | MYO<br>1G            | 1.51<br>733<br>3 | PYHI<br>N1     | 1.84<br>230<br>6 | IGHV<br>3-23       | 3.10<br>913<br>7 | ASB4               | -<br>1.25<br>158 |
| SOD3           | 1.84<br>255<br>9 | HVCN<br>1            | 1.18<br>734<br>9 | HLA<br>-<br>DPB<br>2 | 1.73<br>902<br>7 | SFMB<br>T2     | 1.08<br>371<br>8 | IGKV<br>1-9        | 3.36<br>173<br>8 | GAL<br>R3          | -<br>1.12<br>335 |
| AEBP           | 2.47             | SUSD                 | 2.56             | CHR                  | 2.03             | TME            | 1.42             | TRB                | 2.22             | AL02               | -                |

|                |                  |                     |                  |                      |                  |                   |                  |                     |                  |                    |                  |
|----------------|------------------|---------------------|------------------|----------------------|------------------|-------------------|------------------|---------------------|------------------|--------------------|------------------|
| 1              | 390<br>9         | 5                   | 664<br>9         | DL1                  | 415<br>2         | M71               | 263<br>4         | V6-6                | 460<br>8         | 3583.<br>1         | 1.12<br>478      |
| PTGE<br>R2     | 1.36<br>327<br>4 | SFTA2               | 2.48<br>883<br>3 | MS4<br>A6A           | 1.65<br>930<br>3 | FOSB              | 1.37<br>938<br>1 | MRVI                | 1.61<br>550<br>6 | SRA<br>RP          | -<br>1.25<br>968 |
| DUSP<br>4      | 1.35<br>100<br>7 | FABP3               | 2.01<br>285      | GLT<br>8D2           | 1.66<br>426<br>5 | PTPN<br>7         | 1.76<br>073<br>3 | LINC<br>02446       | 2.28<br>126<br>6 | C1QT<br>NF3        | -<br>1.86        |
| F3             | 1.27<br>546<br>7 | IGSF2<br>1          | 1.15<br>559<br>5 | COL<br>6A2           | 1.63<br>848<br>5 | KLRD<br>1         | 1.35<br>625<br>2 | SSC5<br>D           | 1.97<br>987      | PLPP<br>R1         | -<br>1.14<br>827 |
| MND<br>A       | 1.67<br>742      | IGHV<br>1OR15<br>-2 | 2.98<br>693<br>2 | ZNF<br>683           | 1.87<br>709<br>2 | TRAV<br>3         | 2.13<br>110<br>1 | CILP                | 1.90<br>536      | GLU<br>LP4         | -<br>1.40<br>981 |
| NMN<br>AT2     | 2.43<br>059<br>4 | TIGIT               | 2.06<br>818<br>4 | CPX<br>M2            | 1.91<br>092<br>8 | TSPA<br>N11       | 1.23<br>189<br>9 | AC07<br>9015.<br>1  | 1.29<br>517<br>6 | AP00<br>0593.<br>3 | -<br>2.02<br>394 |
| AC01<br>3264.1 | 1.92<br>110<br>1 | KEL                 | 2.23<br>838<br>1 | CLE<br>CL1           | 1.70<br>729<br>3 | STM<br>N2         | 2.64<br>036<br>4 | PCBP<br>3           | 1.43<br>323<br>4 | GLU<br>L           | -<br>1.44<br>5   |
| MOX<br>D1      | 2.58<br>976<br>4 | IGHV<br>3-71        | 3.44<br>400<br>1 | FMN<br>L1            | 1.25<br>064      | OGN               | 2.38<br>633<br>3 | IGHV<br>2-70        | 3.31<br>215<br>9 | LINC<br>00886      | -<br>1.11<br>682 |
| IGLV<br>3-16   | 3.79<br>107<br>2 | TRBV<br>6-5         | 1.83<br>620<br>9 | STA<br>B2            | 1.94<br>049<br>4 | PLTP              | 1.57<br>211<br>8 | CXC<br>L14          | 2.30<br>272      | HIST<br>1H4P<br>S1 | -<br>1.19<br>896 |
| PLXD<br>C1     | 1.36<br>772<br>7 | SCAR<br>A5          | 3.01<br>992<br>3 | CAD<br>M3            | 2.23<br>938<br>8 | TRBV<br>5-6       | 2.52<br>333<br>8 | ITK                 | 1.99<br>901<br>1 | AC09<br>0150.<br>1 | -<br>1.15<br>498 |
| LILR<br>B1     | 1.76<br>241<br>7 | HLA-<br>DQA1        | 1.95<br>307<br>9 | CD2<br>26            | 1.75<br>741<br>8 | CD5L              | 1.78<br>322<br>5 | CCL4                | 1.62<br>068<br>1 | AC00<br>7406.<br>1 | -<br>1.07<br>39  |
| WAS            | 1.28<br>483<br>9 | CYTH<br>4           | 1.36<br>273<br>8 | HLA<br>-<br>DPB<br>1 | 1.68<br>485      | CTSG              | 1.55<br>251<br>5 | IGHV<br>1OR1<br>5-9 | 2.47<br>973<br>7 | FAM<br>169A        | -<br>1.21<br>733 |
| TFEC           | 1.85<br>999<br>3 | FCGR<br>1B          | 1.81<br>227<br>8 | TRA<br>V4            | 2.15<br>924<br>4 | ADG<br>RB2        | 1.65<br>896<br>7 | LOX<br>L1           | 2.72<br>725      | AC00<br>5841.<br>1 | -<br>1.22<br>751 |
| AF127<br>936.1 | 1.56<br>655<br>5 | TRBV<br>27          | 2.13<br>308<br>1 | C2C<br>D4A           | 1.08<br>933<br>8 | TRAV<br>23DV<br>6 | 2.39<br>715<br>3 | TNN<br>T3           | 3.50<br>723<br>2 | RGS<br>L1          | -<br>2.20<br>544 |
| ARH<br>GAP1    | 1.58<br>464      | GALN<br>T5          | 3.10<br>131      | TRD<br>C             | 1.66<br>586      | IGKV<br>1OR2-     | 2.09<br>302      | IGLV<br>2-14        | 2.49<br>321      | AP00<br>1331.      | -<br>1.89        |

|                |                  |              |                  |             |                  |                |                  |              |                  |                   |                  |
|----------------|------------------|--------------|------------------|-------------|------------------|----------------|------------------|--------------|------------------|-------------------|------------------|
| 5              | 3                |              | 7                |             | 8                | 108            |                  |              | 5                | 1                 | 468              |
| NCF4           | 1.41<br>846<br>8 | HLA-DQA2     | 1.81<br>243<br>4 | IGK<br>V1-6 | 2.57<br>514<br>7 | TACS<br>TD2    | 1.57<br>241<br>4 | ADA<br>MTS1  | 1.63<br>923<br>6 | MTN<br>D4LP<br>30 | -<br>1.31<br>629 |
| AL59<br>0648.3 | 1.43<br>130<br>9 | P2RY1<br>0   | 1.77<br>184<br>4 | MMP<br>12   | 2.40<br>222<br>6 | CERK<br>L      | 1.38<br>217<br>2 | FER<br>MT3   | 1.52<br>664<br>7 | TBX3              | -<br>1.24<br>349 |
| TRGV<br>10     | 1.64<br>277<br>2 | CLIC6        | 1.45<br>859      | ANX<br>A1   | 1.43<br>291<br>7 | AC02<br>6369.3 | 1.81<br>087<br>2 | SIGL<br>EC10 | 1.85<br>071<br>6 | RHB<br>G          | -<br>1.78<br>067 |
| AC00<br>6059.1 | 1.29<br>736<br>5 | SIGLE<br>C12 | 1.31<br>351<br>3 | NCR<br>3    | 1.64<br>258      | IGHV<br>3-41   | 1.90<br>893<br>7 | GAB<br>RP    | 2.60<br>473<br>1 | KLK<br>4          | -<br>2.89<br>054 |

DEGS, differentially expressed genes.

**Supplementary Table S3 PPI network core genes from DEGs screened by ImmuneScore and StromalScore**

| Gene       | Co<br>unt | Gene         | Co<br>unt | Gene       | Co<br>unt | Gene       | Co<br>unt | Gene        | Co<br>unt | Gene        | Co<br>unt |
|------------|-----------|--------------|-----------|------------|-----------|------------|-----------|-------------|-----------|-------------|-----------|
| CXCL<br>8  | 25        | CD86         | 8         | ALOX<br>5  | 3         | MMP7       | 2         | CFP         | 1         | LCP1        | 1         |
| SYK        | 25        | HCK          | 8         | ANXA<br>1  | 3         | NLRP3      | 2         | CHN1        | 1         | LGAL<br>S9  | 1         |
| CXCL<br>12 | 22        | HLA-<br>DMB  | 8         | C1QA       | 3         | NTF3       | 2         | CLEC<br>4E  | 1         | LGR5        | 1         |
| CCL5       | 20        | HLA-<br>DQA2 | 8         | C1QB       | 3         | NTRK2      | 2         | CLEC<br>7A  | 1         | LOXL<br>1   | 1         |
| CXCL<br>1  | 20        | IL6          | 8         | C3AR<br>1  | 3         | P2RY1<br>0 | 2         | COL1<br>6A1 | 1         | LTF         | 1         |
| CD4        | 19        | ITK          | 8         | CCR4       | 3         | PLCB2      | 2         | COLE<br>C10 | 1         | LY86        | 1         |
| LCK        | 19        | CD79<br>A    | 7         | CD33       | 3         | PTGIS      | 2         | COTL<br>1   | 1         | LYVE<br>1   | 1         |
| CXCL<br>11 | 18        | COL5<br>A1   | 7         | CD72       | 3         | RHOH       | 2         | CR2         | 1         | MAP4<br>K1  | 1         |
| CCL4       | 16        | COL6<br>A1   | 7         | CLEC<br>1B | 3         | RIPK3      | 2         | CSF2<br>RA  | 1         | MMP1<br>2   | 1         |
| CXCL<br>9  | 16        | HLA-<br>DQB2 | 7         | CLEC<br>5A | 3         | S1PR4      | 2         | CTSG        | 1         | NCKA<br>P1L | 1         |
| IL10       | 16        | HLA-<br>DRB5 | 7         | CSF1<br>R  | 3         | SAA1       | 2         | DOC<br>K2   | 1         | OGN         | 1         |
| LCP2       | 16        | IL2RG        | 7         | CXCR<br>6  | 3         | SELP       | 2         | DOK2        | 1         | OMD         | 1         |
| CD3E       | 15        | CD19         | 6         | GNG2       | 3         | SEMA4      | 2         | DUO         | 1         | OMG         | 1         |

|              |    |             |   |              |   |               |   |            |   |              |   |
|--------------|----|-------------|---|--------------|---|---------------|---|------------|---|--------------|---|
|              |    |             |   |              |   | D             |   | X2         |   |              |   |
| CXCL<br>5    | 15 | CD8A        | 6 | ITGA3        | 3 | SH2D1<br>A    | 2 | DUO<br>XA2 | 1 | PDE6<br>G    | 1 |
| CXCR<br>4    | 15 | COL6<br>A2  | 6 | ITGA4        | 3 | SLA           | 2 | EFNB<br>3  | 1 | PDPN         | 1 |
| CCL19        | 14 | COL6<br>A3  | 6 | ITGB6        | 3 | SOCS3         | 2 | EGR2       | 1 | PIK3R<br>5   | 1 |
| CCL21        | 14 | DCN         | 6 | LUM          | 3 | SPI1          | 2 | EGR3       | 1 | PLAU         | 1 |
| CCR5         | 14 | FCGR<br>3A  | 6 | MMP2         | 3 | TBX21         | 2 | ELN        | 1 | PLN          | 1 |
| VAV1         | 14 | FPR1        | 6 | NCF1         | 3 | TBXAS<br>1    | 2 | EPHA<br>3  | 1 | PRF1         | 1 |
| CCR2         | 13 | IL1B        | 6 | NCF4         | 3 | TNFRS<br>F13C | 2 | EVI2<br>A  | 1 | PTCH<br>2    | 1 |
| HLA-<br>DRA  | 13 | ITGA<br>X   | 6 | NGFR         | 3 | TREM2         | 2 | EVI2<br>B  | 1 | RNF4<br>3    | 1 |
| ZAP70        | 13 | WAS         | 6 | PRKC<br>Q    | 3 | VSIG4         | 2 | FCGR<br>1B | 1 | RUNX<br>3    | 1 |
| CCR1         | 12 | CCL11       | 5 | SELP<br>LG   | 3 | WIPF1         | 2 | FCN3       | 1 | SELL         | 1 |
| ITGB2        | 12 | CD80        | 5 | TNFS<br>F13B | 3 | ABI3          | 1 | FLT3       | 1 | SIGLE<br>C14 | 1 |
| PTPR<br>C    | 12 | CYBB        | 5 | VCAN         | 3 | ABI3B<br>P    | 1 | FPR3       | 1 | SIRPB<br>1   | 1 |
| BTK          | 11 | GNB4        | 5 | ARHG<br>DIB  | 2 | ACKR1         | 1 | GATA<br>3  | 1 | SLA2         | 1 |
| CD247        | 11 | PTGS2       | 5 | C1QC         | 2 | ACTN2         | 1 | GBP5       | 1 | SLAM<br>F1   | 1 |
| COL1<br>A1   | 11 | PTPN2<br>2  | 5 | C5AR<br>1    | 2 | ADAM<br>28    | 1 | GLI3       | 1 | SLAM<br>F6   | 1 |
| CXCR<br>2    | 11 | ADA<br>MTS2 | 4 | CCL2<br>2    | 2 | AIM2          | 1 | GPR8<br>4  | 1 | SOD3         | 1 |
| CXCR<br>3    | 11 | CD2         | 4 | CD300<br>A   | 2 | ALOX5<br>AP   | 1 | GPS<br>M3  | 1 | STAB<br>2    | 1 |
| HLA-<br>DRB1 | 11 | CD22        | 4 | CD40<br>LG   | 2 | ANK2          | 1 | GPX8       | 1 | TCN1         | 1 |
| TYRO<br>BP   | 11 | CD53        | 4 | CD5          | 2 | ARHG<br>AP9   | 1 | GZM<br>A   | 1 | TLR2         | 1 |
| CD74         | 10 | CIITA       | 4 | CLEC<br>12A  | 2 | ATP2A<br>3    | 1 | HAV<br>CR2 | 1 | TLR7         | 1 |
| CXCR<br>1    | 10 | CSF2R<br>B  | 4 | DAPP<br>1    | 2 | BIN2          | 1 | HCLS<br>1  | 1 | TLR8         | 1 |
| HLA-         | 10 | FCGR        | 4 | FBN1         | 2 | BIRC3         | 1 | HLA-       | 1 | TME          | 1 |

|          |    |          |   |        |   |        |   |         |   |          |   |
|----------|----|----------|---|--------|---|--------|---|---------|---|----------|---|
| DQA1     |    | 1A       |   |        |   |        |   | DOA     |   | M173     |   |
| RAC2     | 10 | FGR      | 4 | FCGR2A | 2 | BLK    | 1 | IFI16   | 1 | TNFRSF17 | 1 |
| CCR7     | 9  | GNA15    | 4 | FZD2   | 2 | C7     | 1 | IL10RA  | 1 | TNFRSF8  | 1 |
| COL1A2   | 9  | GNGT2    | 4 | GNG8   | 2 | CAMK4  | 1 | IL16    | 1 | TNFSF8   | 1 |
| COL3A1   | 9  | HLA-DPB1 | 4 | ICAM3  | 2 | CAMK1  | 1 | IL18BP  | 1 | TNNT3    | 1 |
| CXCL3    | 9  | ICAM1    | 4 | IL21R  | 2 | CD177  | 1 | IL18RAP | 1 | TRIM22   | 1 |
| HLA-DPA1 | 9  | IL2RA    | 4 | IL7R   | 2 | CD180  | 1 | IL34    | 1 | WNT10A   | 1 |
| HLA-DQB1 | 9  | LILRB2   | 4 | INPP5D | 2 | CD209  | 1 | ITGA9   | 1 | WNT2     | 1 |
| IL2RB    | 9  | MMP9     | 4 | LAIR1  | 2 | CD27   | 1 | KLRD1   | 1 | ZBP1     | 1 |
| JAK3     | 9  | PLAUR    | 4 | LPAR1  | 2 | CD300E | 1 | L1CAM   | 1 |          |   |
| CD3G     | 8  | TIMP1    | 4 | LPAR5  | 2 | CD70   | 1 | LAMA2   | 1 |          |   |

**Supplementary Table S4 Poor prognosis related genes from DEGs screened by ImmuneScore and StromalScore**

| gene      | KM       | HR       | HR.95L   | HR.95H   | pvalue   |
|-----------|----------|----------|----------|----------|----------|
| PTPRO     | 0.033424 | 2.238024 | 1.152786 | 4.344911 | 0.017312 |
| SPOCD1    | 0.015313 | 1.213828 | 1.035583 | 1.422752 | 0.016781 |
| SPTSSB    | 0.046119 | 1.068222 | 1.011319 | 1.128328 | 0.01813  |
| HTRA3     | 0.011235 | 1.043528 | 1.011301 | 1.076781 | 0.007765 |
| GPR84     | 0.031833 | 1.27537  | 1.104376 | 1.472839 | 0.000927 |
| CXCL5     | 0.023003 | 1.009484 | 1.002221 | 1.016799 | 0.010397 |
| PLAUR     | 0.021906 | 1.023605 | 1.003917 | 1.043679 | 0.018546 |
| TRBV10-3  | 0.04285  | 0.267878 | 0.11143  | 0.643977 | 0.003247 |
| CLEC5A    | 0.00539  | 1.780853 | 1.233664 | 2.570747 | 0.002062 |
| STRA6     | 0.012942 | 1.297887 | 1.036369 | 1.625397 | 0.023139 |
| KLRB1     | 0.04135  | 0.866394 | 0.785469 | 0.955656 | 0.00415  |
| IL7R      | 0.006566 | 0.892265 | 0.800464 | 0.994594 | 0.039607 |
| IL18RAP   | 0.001203 | 0.302831 | 0.131081 | 0.699614 | 0.005172 |
| LINC01094 | 0.043624 | 2.006601 | 1.392642 | 2.891228 | 0.000186 |
| MMP9      | 0.009448 | 1.003832 | 1.000028 | 1.007651 | 0.04833  |
| LINC00426 | 0.003218 | 0.186921 | 0.037245 | 0.938083 | 0.041588 |
| TREM2     | 0.021588 | 1.018437 | 1.003249 | 1.033854 | 0.017166 |
| FLT3      | 0.048108 | 0.151001 | 0.030576 | 0.745719 | 0.020339 |

|       |          |          |          |          |          |
|-------|----------|----------|----------|----------|----------|
| MSR1  | 0.040151 | 1.12339  | 1.026461 | 1.229472 | 0.011496 |
| ITGB6 | 0.002084 | 1.293882 | 1.046206 | 1.600191 | 0.017471 |

HR, Hazard Ratio.

**Supplementary Table S5 Antibodies used in this study**

| Name                                         | Supplier    | Cat no.     |
|----------------------------------------------|-------------|-------------|
| FITC anti-mouse CD11b antibody               | BD          | #557396     |
| PE anti-mouse Ly-6G/Ly-6C antibody           | BD          | #553128     |
| PE-CF594 anti-mouse CD11c antibody           | BD          | #562454     |
| PERCP anti-mouse CD3 antibody                | BD          | #551163     |
| PE-CY7 anti-mouse CD86 antibody              | BD          | #560582     |
| APC anti-mouse CD206 antibody                | BD          | #565250     |
| AF700 Fixable Viability Stain                | BD          | #564997     |
| APC-CY7 anti-mouse CD45 antibody             | BD          | #557659     |
| BV421 anti-mouse F4/80 antibody              | BD          | #565411     |
| BV480 anti-mouse IA/IE antibody              | BD          | #566086     |
| BV605 anti-mouse CD19 antibody               | BD          | #563148     |
| BV650 anti-mouse NK1.1 antibody              | BD          | #564143     |
| FITC anti-mouse CD8a antibody                | BD          | #553030     |
| PE anti-mouse CD152(CTLA-4) antibody         | BD          | #553720     |
| PE-CY7 anti-mouse CD44 antibody              | BD          | #560569     |
| APC anti-mouse CD62L antibody                | BD          | #553152     |
| BV421 anti-mouse CD4 antibody                | BD          | #562891     |
| BV510 anti-mouse CD223(LAG3) antibody        | BD          | #746508     |
| BV605 anti-mouse CD279(PD-1) antibody        | BD          | #563059     |
| BV650 anti-mouse CD366(TIM-3) antibody       | BD          | #747623     |
| PE anti-mouse GranzymeB antibody             | BD          | #12-8898-82 |
| APC anti-mouse IFN $\gamma$ antibody         | BD          | #554413     |
| Ms CD16/CD32 Pure 2.4G2 100ug                | BD          | #553141     |
| BB515 anti-human CD4 antibody                | BD          | #564419     |
| PE anti-human CD47 antibody                  | BD          | #556046     |
| BB700 anti-human CD8 antibody                | BD          | #566452     |
| Alexa Fluor647 anti-human GranzymeB antibody | BD          | #560212     |
| APC-CY7 anti-human CD45 antibody             | BD          | #557833     |
| BV421 anti-human CD56 antibody               | BD          | #562751     |
| BV510 anti-human CD19 antibody               | BD          | #562947     |
| BV605 anti-human CD3 antibody                | BD          | #562994     |
| BV786 anti-human IFN $\gamma$ antibody       | BD          | #563731     |
| BV421 anti-human CD183(CXCR3) antibody       | BD          | #562558     |
| MMP9 (N-terminal) Polyclonal antibody        | Proteintech | #10375-2-AP |
| MMP9 antibody                                | BOSTER      | #PB9669     |
| SSH1 Polyclonal antibody                     | ECM         | #SP1711     |
| CXCR3 Polyclonal antibody                    | Proteintech | #26756-1-AP |

|                                                    |             |             |
|----------------------------------------------------|-------------|-------------|
| CXCR3B-specific Monoclonal antibody                | Proteintech | #60065-1-Ig |
| SIRT2 Monoclonal antibody                          | Proteintech | #66410-1-Ig |
| ERK1/2 Polyclonal antibody                         | Proteintech | #11257-1-D8 |
| Phospho-ERK1/2 (Thr202/Tyr204) Polyclonal antibody | Proteintech | #28733-1-AP |
| Phospho-Akt (Ser473) Rabbit mAb                    | CST         | #4060       |
| Akt (pan) Mouse mAb                                | CST         | #2920       |
| JMJD2D Antibody (F-7)                              | Santa Cruz  | #sc-393750  |
| Granzyme B Rabbit pAb                              | Abclonal    | #A2557      |
| KDM4D Rabbit pAb                                   | Abclonal    | #A18138     |
| GAPDH antibody                                     | Proteintech | #15143-1-AP |
| CD8                                                | Abcam       | #ab209775   |
| IFN                                                | Affinity    | #DF6045     |
| $\beta$ -catenin                                   | PTG         | #51067-2-AP |
| Flag antibody                                      | Sigma       | #F1804      |
| HA antibody                                        | Sigma       | #SAB4300603 |
| MYC antibody                                       | Santa Cruz  | #sc-40X     |
| IgG(mouse)                                         | Santa Cruz  | #sc-69786   |
| IgG(rabbit)                                        | CST         | #3900       |

**Supplementary Table S6 Primers and shRNA used in this study**

| Primers        | Sequences               |
|----------------|-------------------------|
| homo-MMP9-F    | TGTACCGCTATGGTTACACTCG  |
| homo-MMP9-R    | GGCAGGGACAGTTGCTTCT     |
| mus-MMP9-F-1   | GCAGAGGCATACTTGTACCG    |
| mus-MMP9-R-1   | TGATGTTATGATGGTCCCCTTG  |
| mus-MMP9-F-2   | CTGGACAGCCAGACACTAAAG   |
| mus-MMP9-R-2   | CTCGCGCAAGTCTTCAGAG     |
| mus-CD44-F     | TCGATTTGAATGTAACCTGCCG  |
| mus-CD44-R     | CAGTCCGGGAGATACTGTAGC   |
| mus-MYC-F      | ATGCCCCTCAACGTGAACTTC   |
| mus-MYC-R      | GTCGCAGATGAAATAGGGCTG   |
| mus-CyclinD1-F | GCGTACCCTGACACCAATCTC   |
| mus-CyclinD1-R | ACTTGAAGTAAGATACGGAGGGC |
| homo-GAPDH-F   | CTGGGCTACACTGAGCACC     |
| homo-GAPDH-R   | AAGTGGTCGTTGAGGGCAATG   |
| mus-GAPDH-F    | AGGTCGGTGTGAACGGATTG    |
| mus-GAPDH-R    | TGTAGACCATGTAGTTGAGGTCA |
|                |                         |
| shRNA target   | Sequences               |
| mus-MMP9-sh    | CAGTACCAAGACAAAGCCTAT   |
| mus-KDM4D-sh1# | CCACGGTAAGTAACGTTTCCTT  |

|                |                       |
|----------------|-----------------------|
| mus-KDM4D-sh2# | ACACAGAGACTATGGTGTCTA |
| mus-SSH1-sh1#  | CCCGTTTAGATCACACCAGTA |
| mus-SSH1-sh2#  | GCAGCGATGAAGAACGAAAT  |
